# Supplementary material
Source: ML conference proceedings conference paper supplement (https://openreview.net/forum?id=ZMxVNpd76mw)

Mean Reward of 20 trajectories  $\pm$  standard deviation

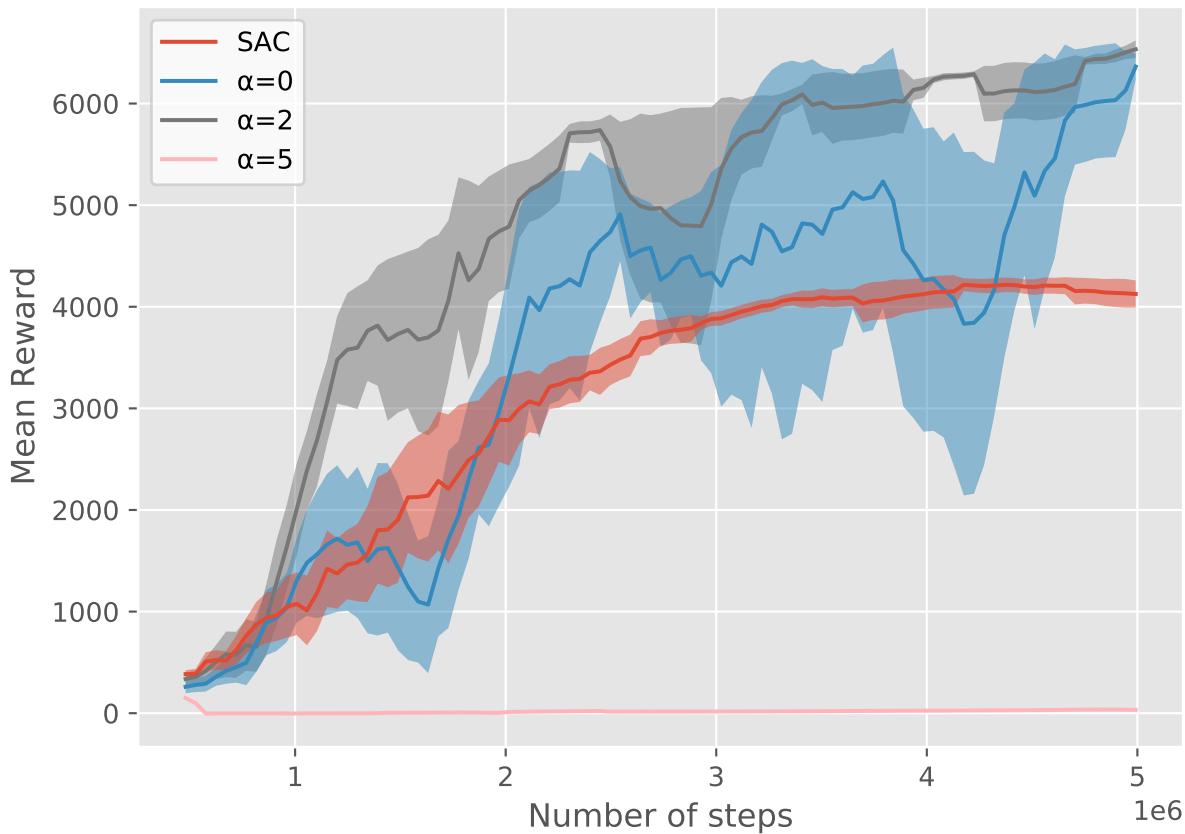

Supplement: supplementary_material [file attachment]

Mean Reward of 20 trajectories  $\pm$  standard deviation

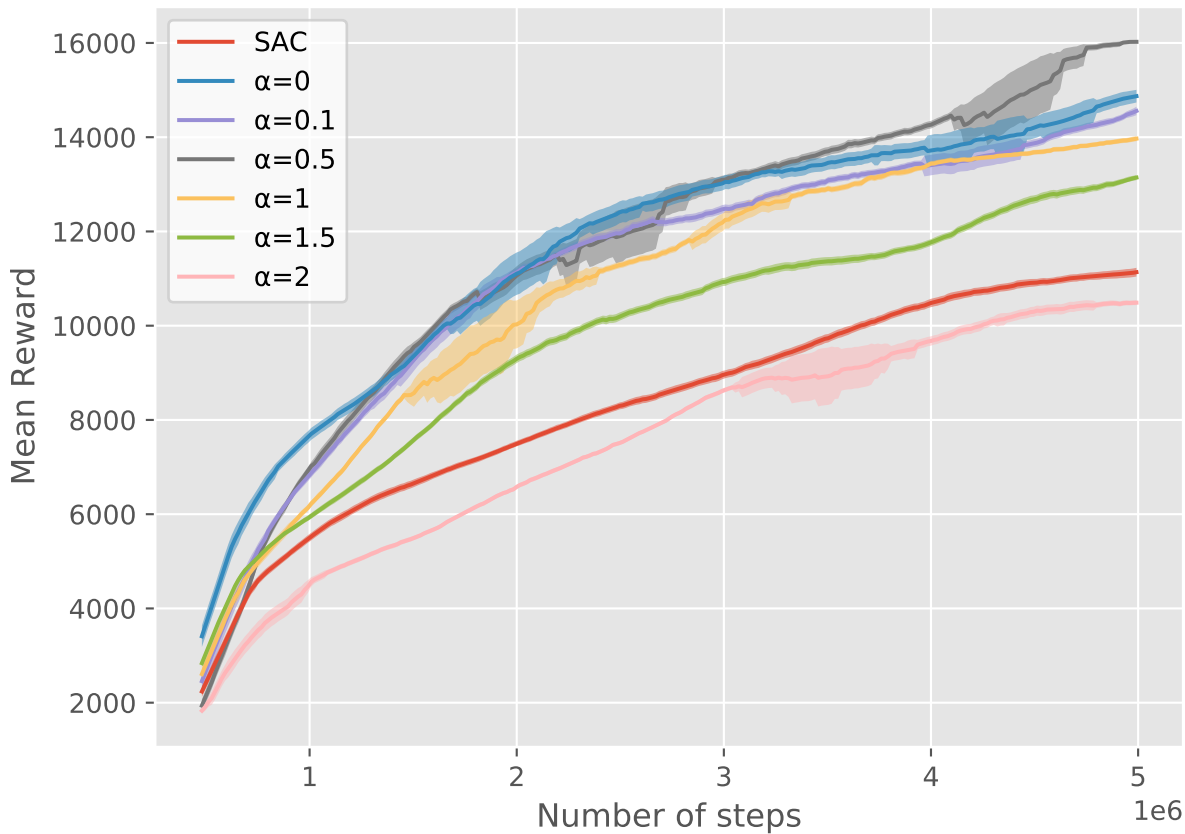

Supplement: supplementary_material [file attachment]

Mean Reward of 20 trajectories  $\pm$  standard deviation



Supplement: supplementary_material [file attachment]

Mean Reward of 20 trajectories  $\pm$  standard deviation

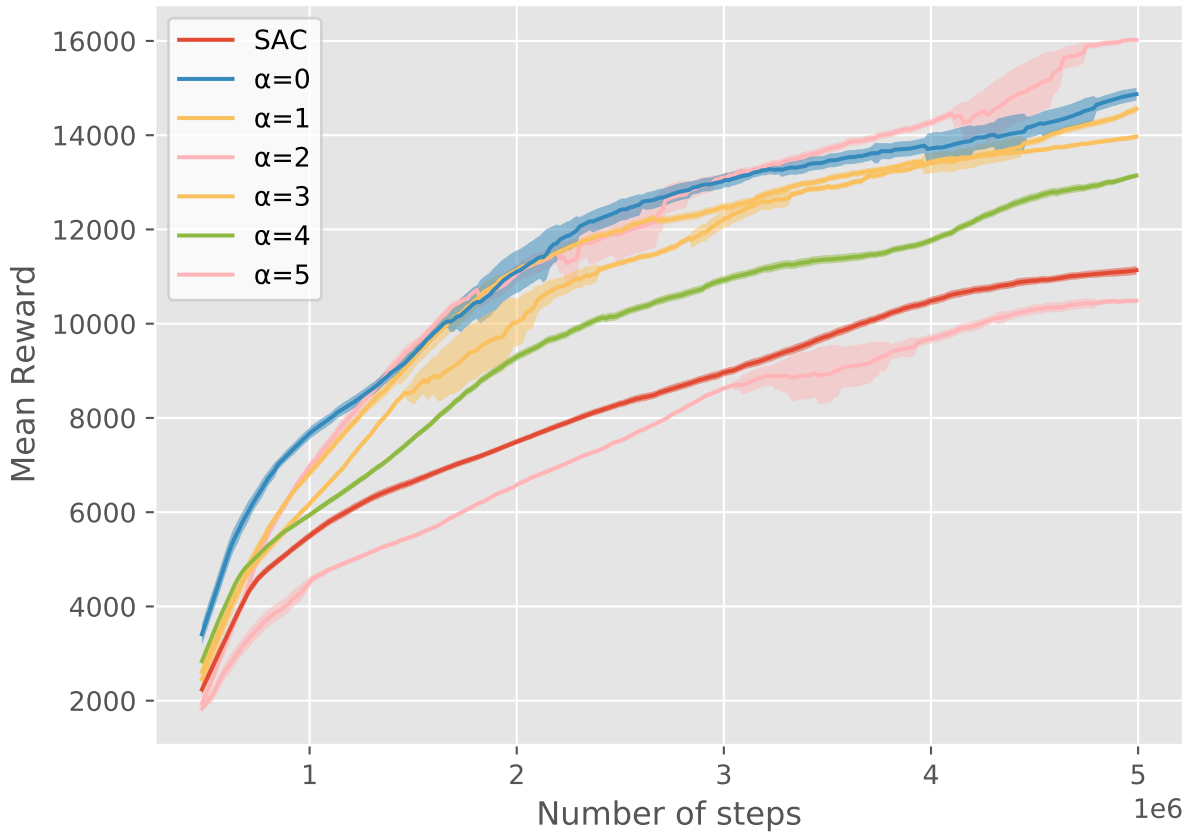

Supplement: supplementary_material [file attachment]

Mean Reward of 20 trajectories  $\pm$  standard deviation

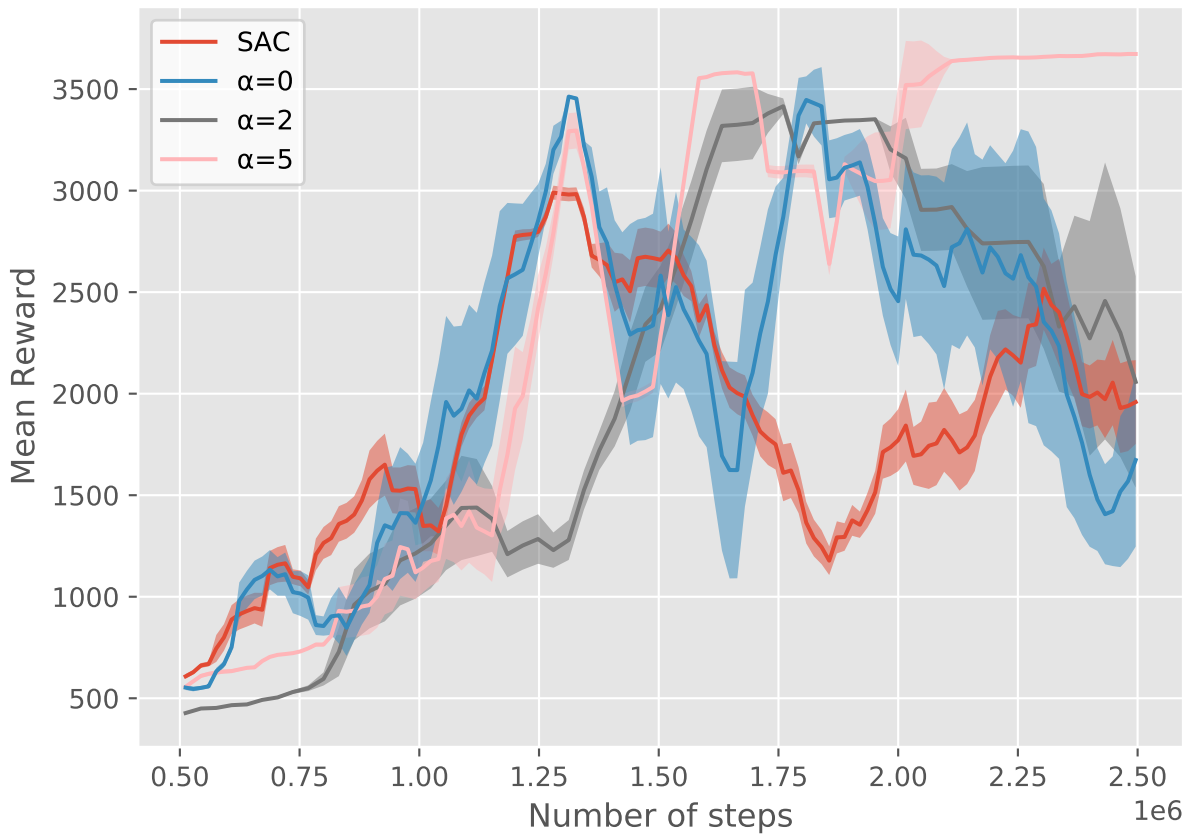

Supplement: supplementary_material [file attachment]

Mean Reward of 20 trajectories  $\pm$  standard deviation

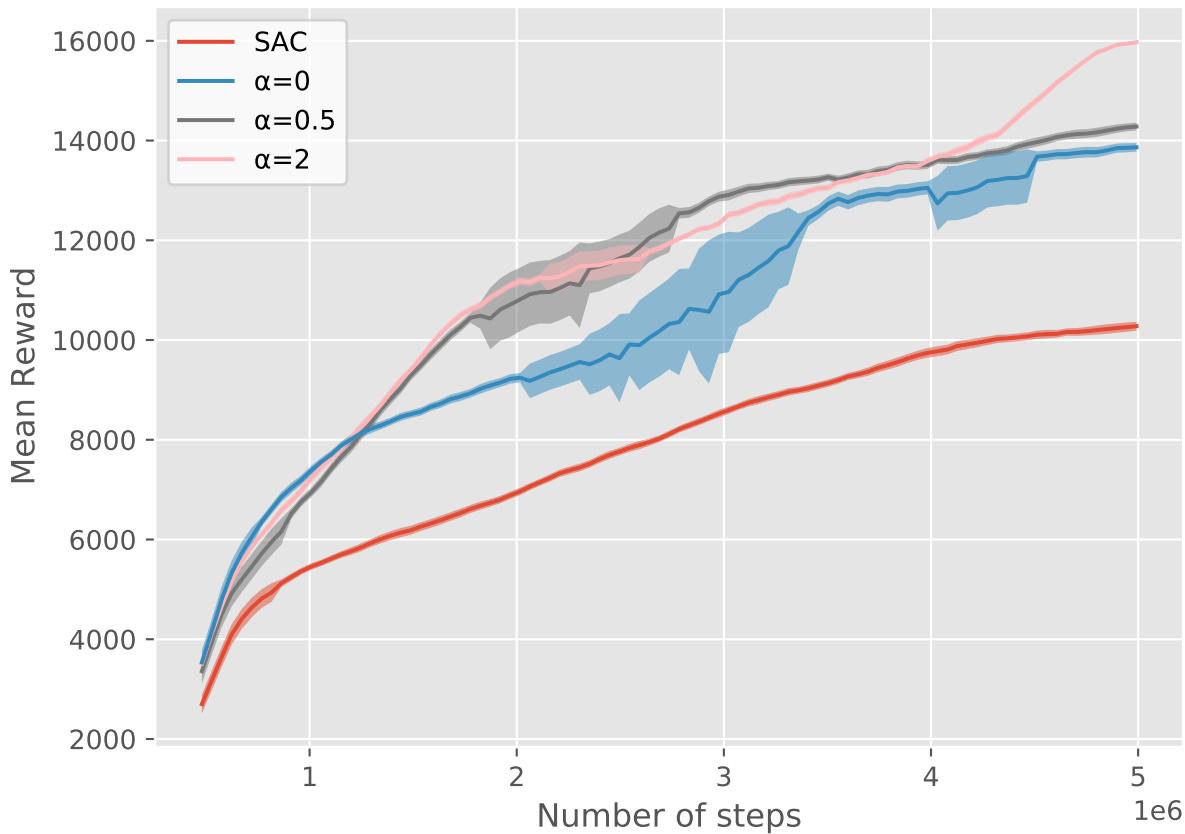

Supplement: supplementary_material [file attachment]

Mean over 20 trajectories

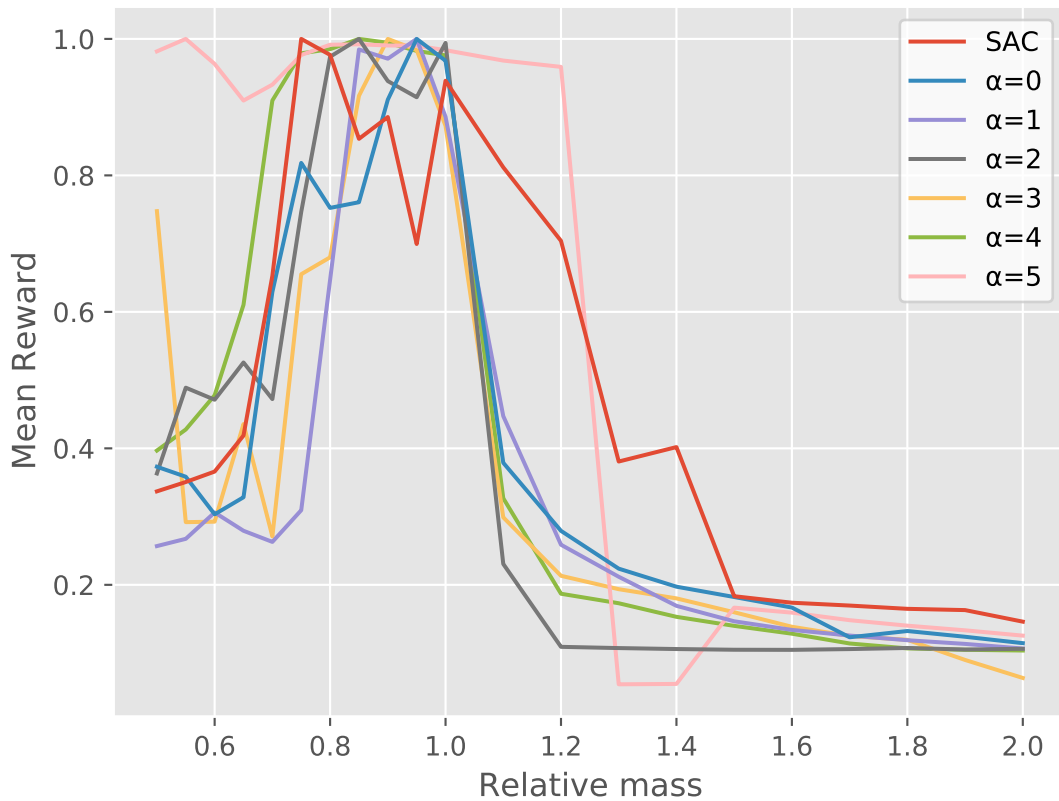

Supplement: supplementary_material [file attachment]

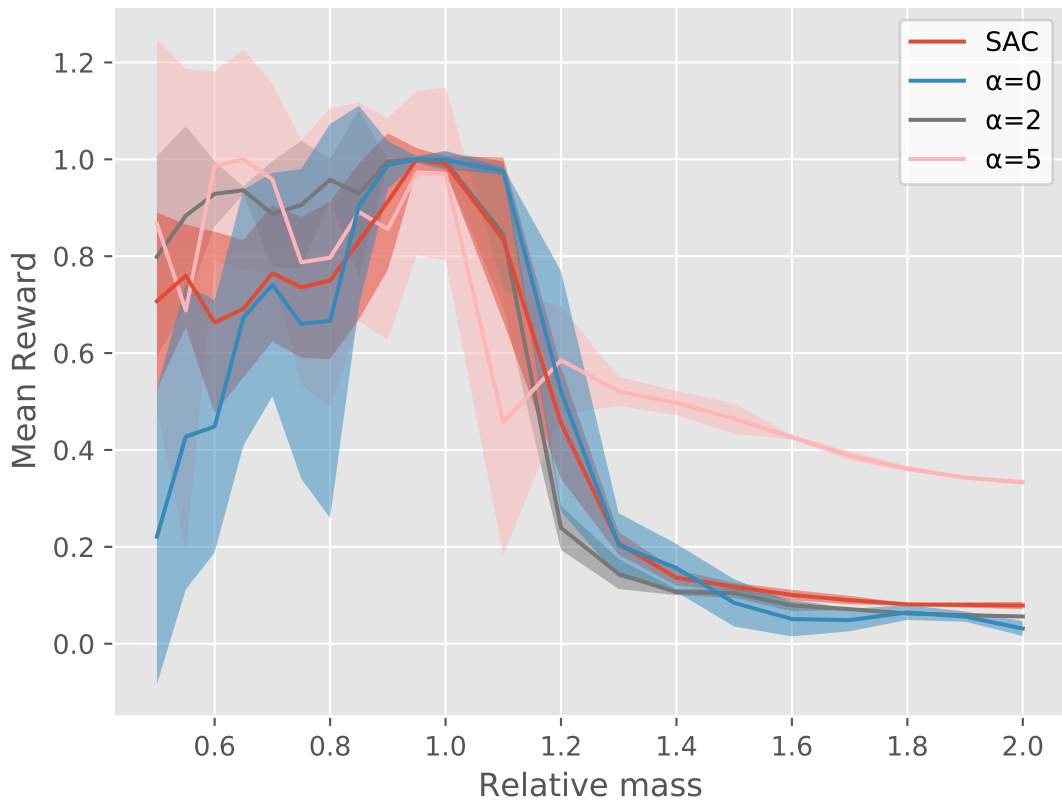

Supplement: supplementary_material [file attachment]

Mean Reward of 20 trajectories  $\pm$  standard deviation

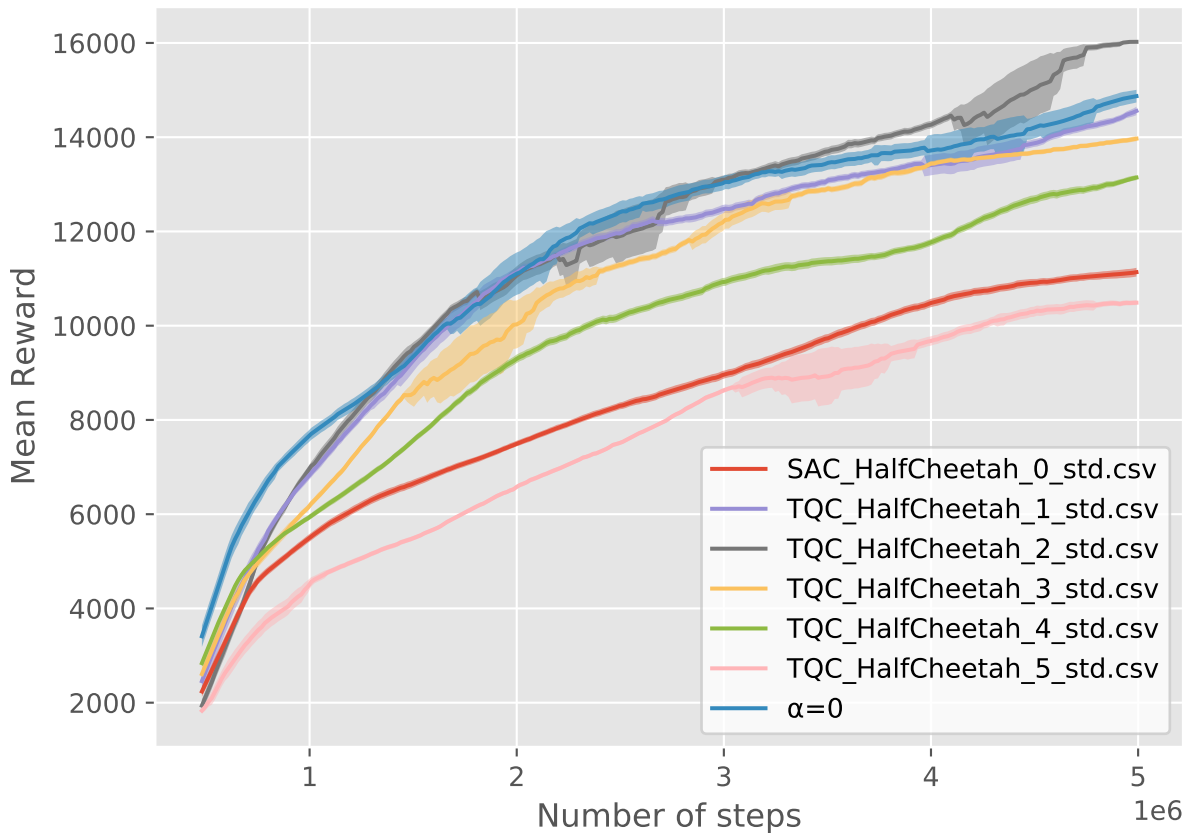

Supplement: supplementary_material [file attachment]

Mean Reward of 20 trajectories  $\pm$  standard deviation

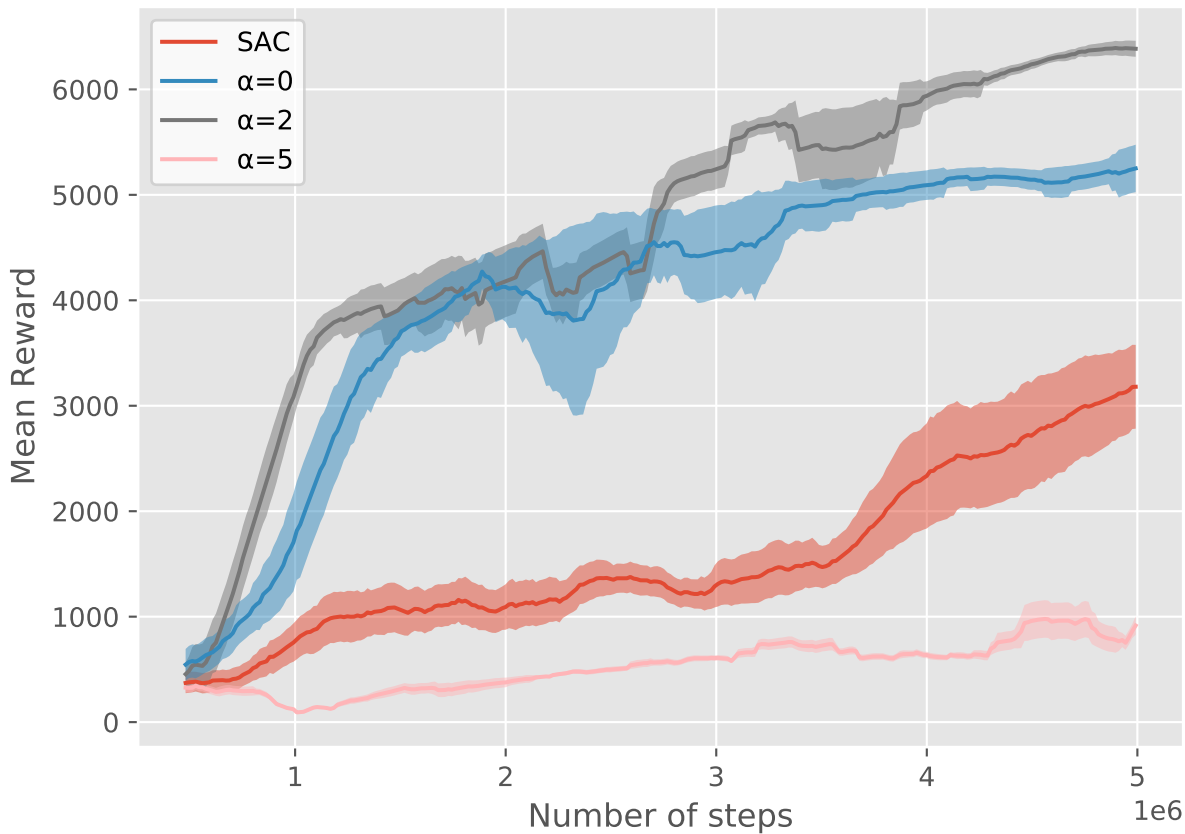

Supplement: supplementary_material [file attachment]

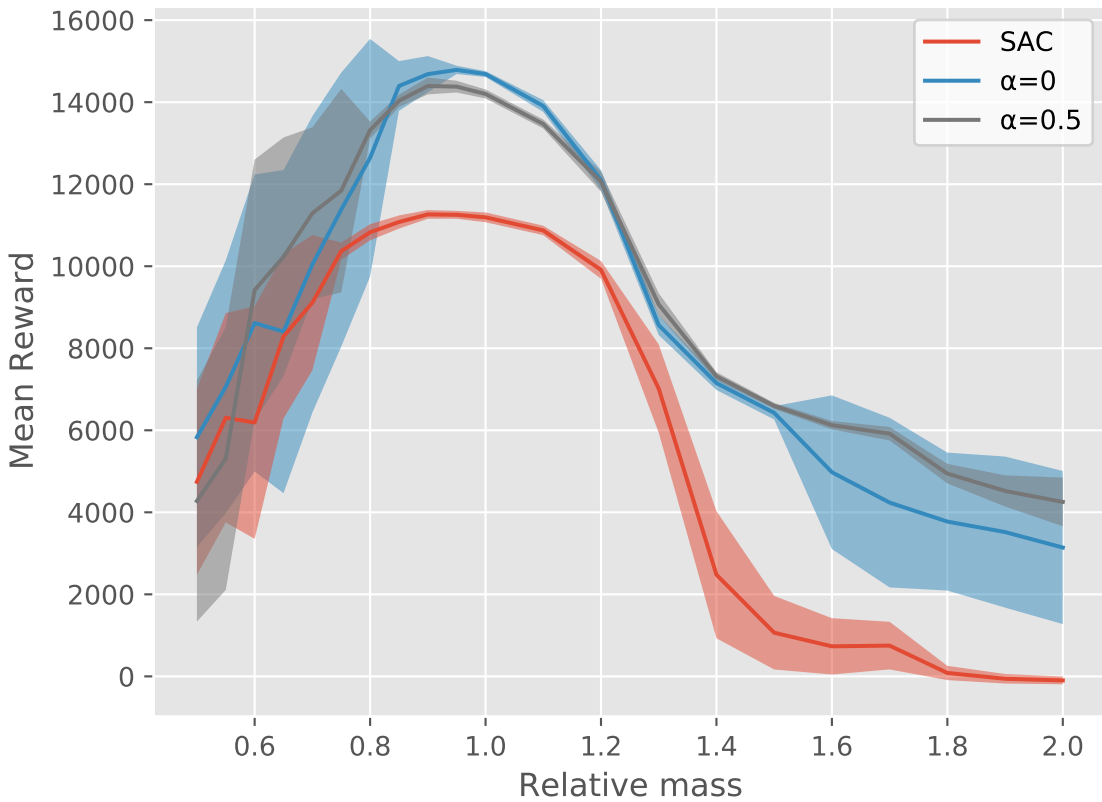

Supplement: supplementary_material [file attachment]

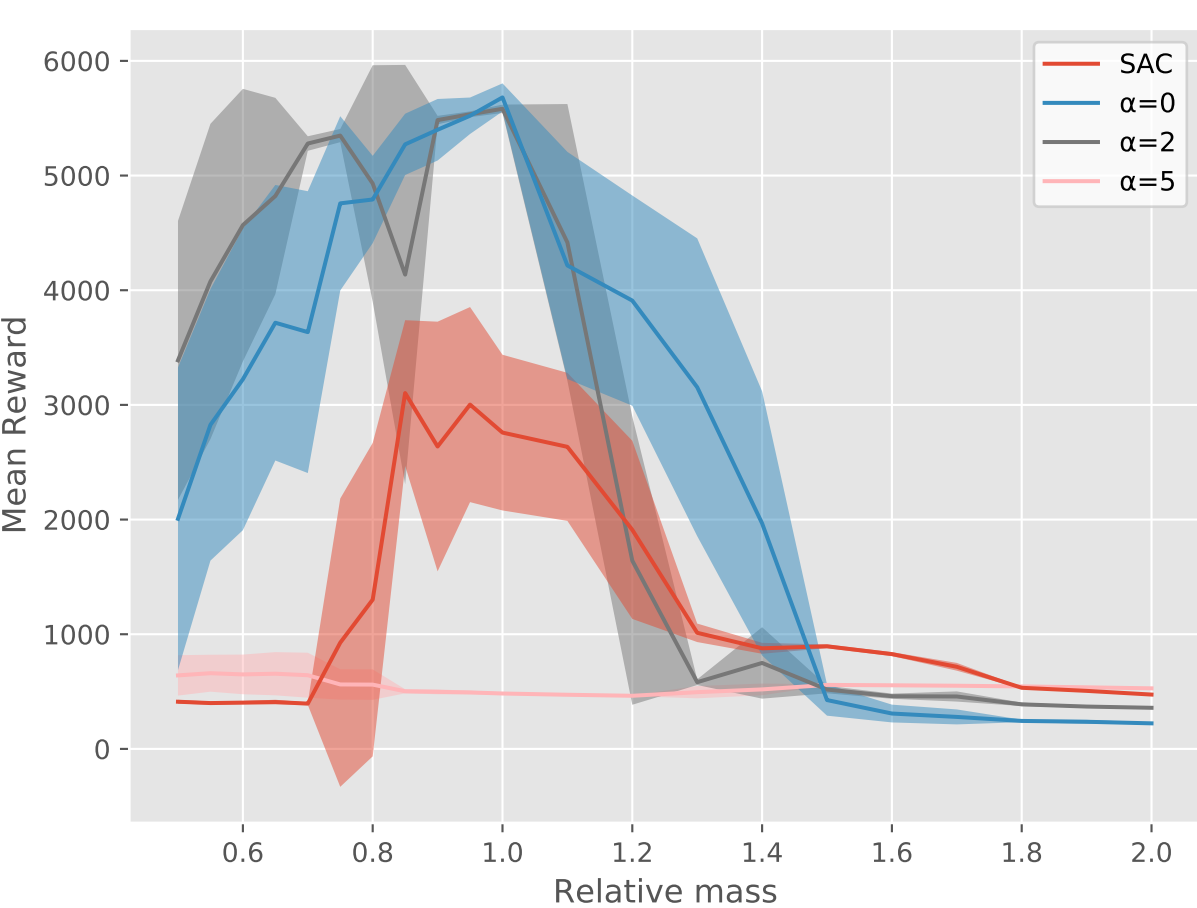

Supplement: supplementary_material [file attachment]

Mean Reward of 20 trajectories  $\pm$  standard deviation

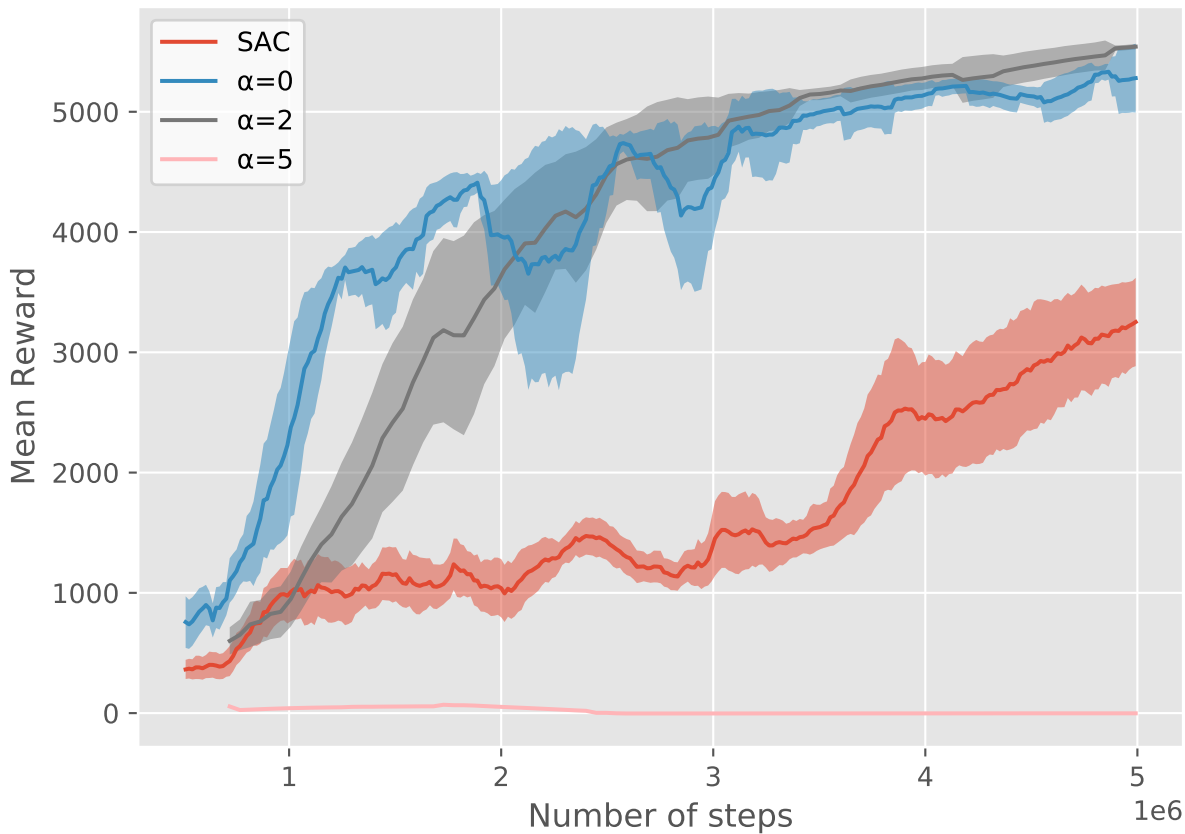

Supplement: supplementary_material [file attachment]

Mean over 20 trajectories

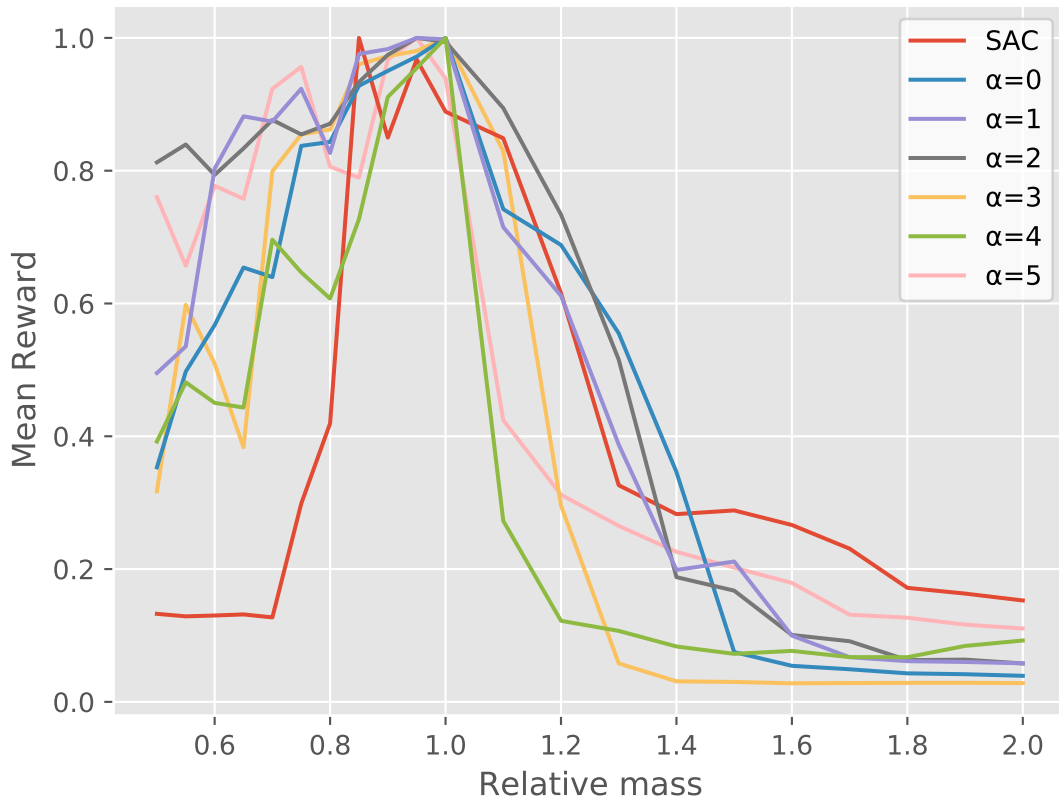

Supplement: supplementary_material [file attachment]

Mean Reward of 20 trajectories  $\pm$  standard deviation

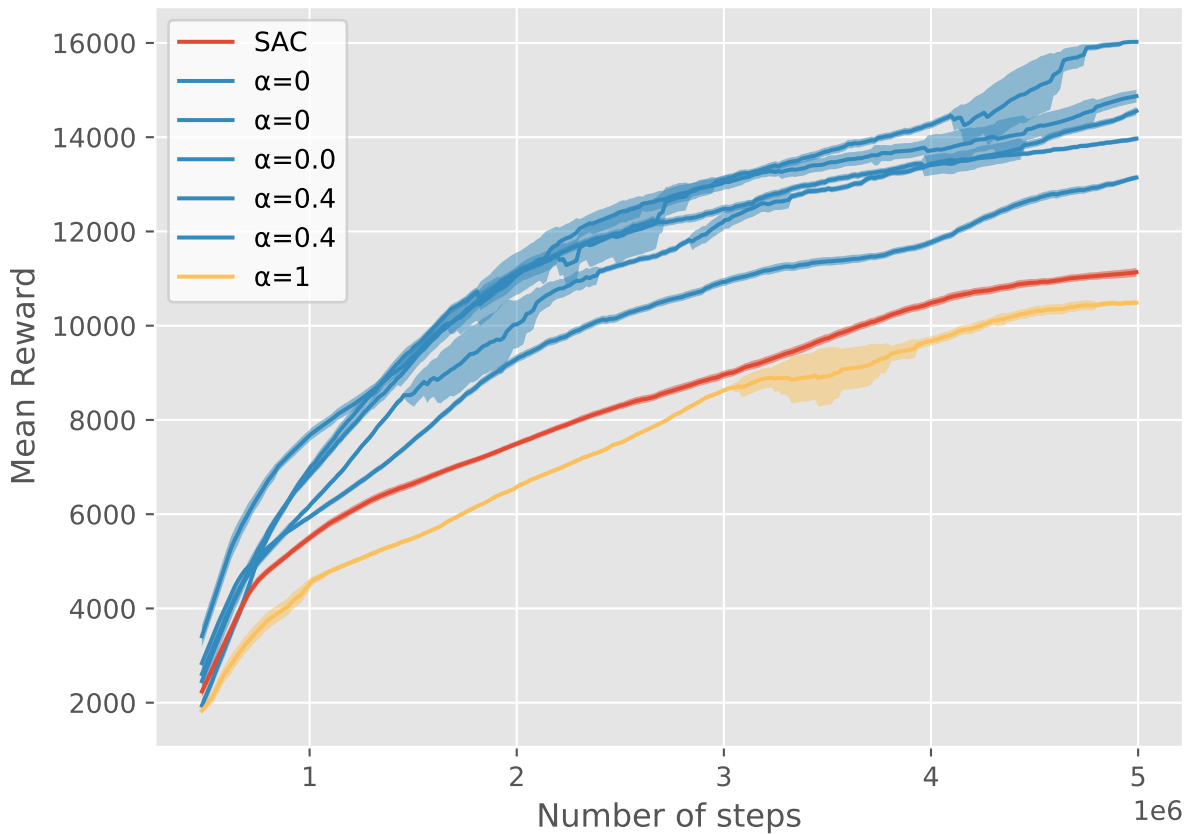

Supplement: supplementary_material [file attachment]

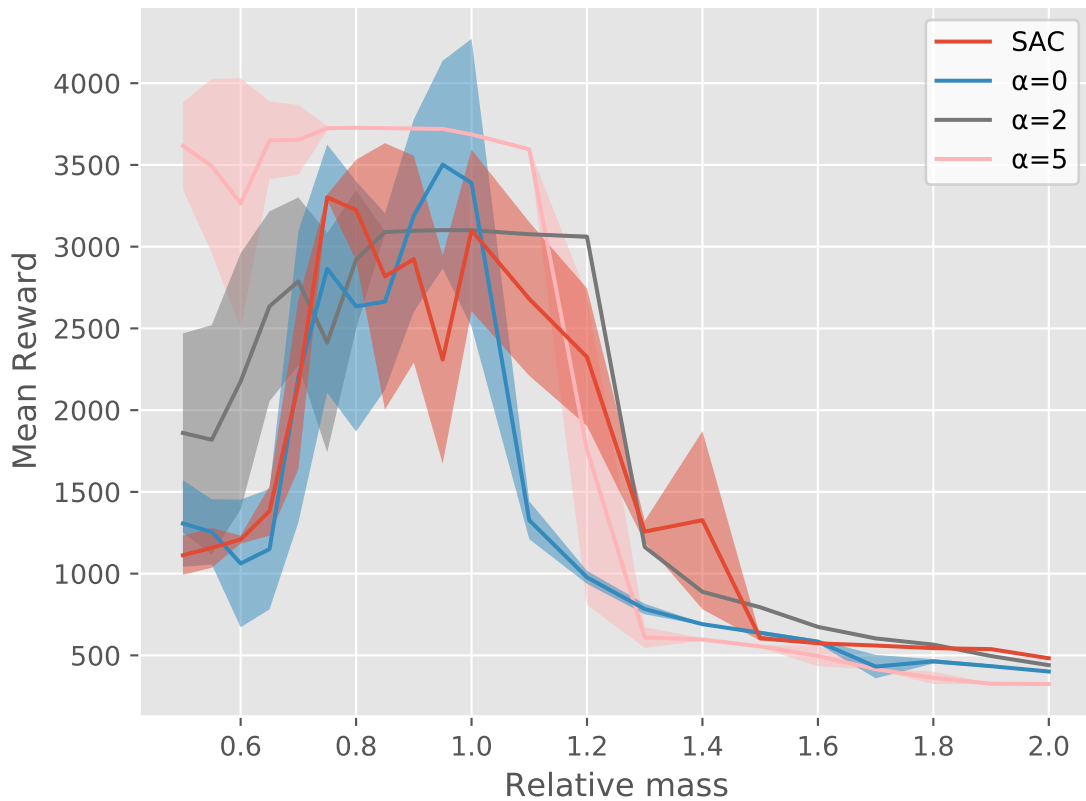

Supplement: supplementary_material [file attachment]

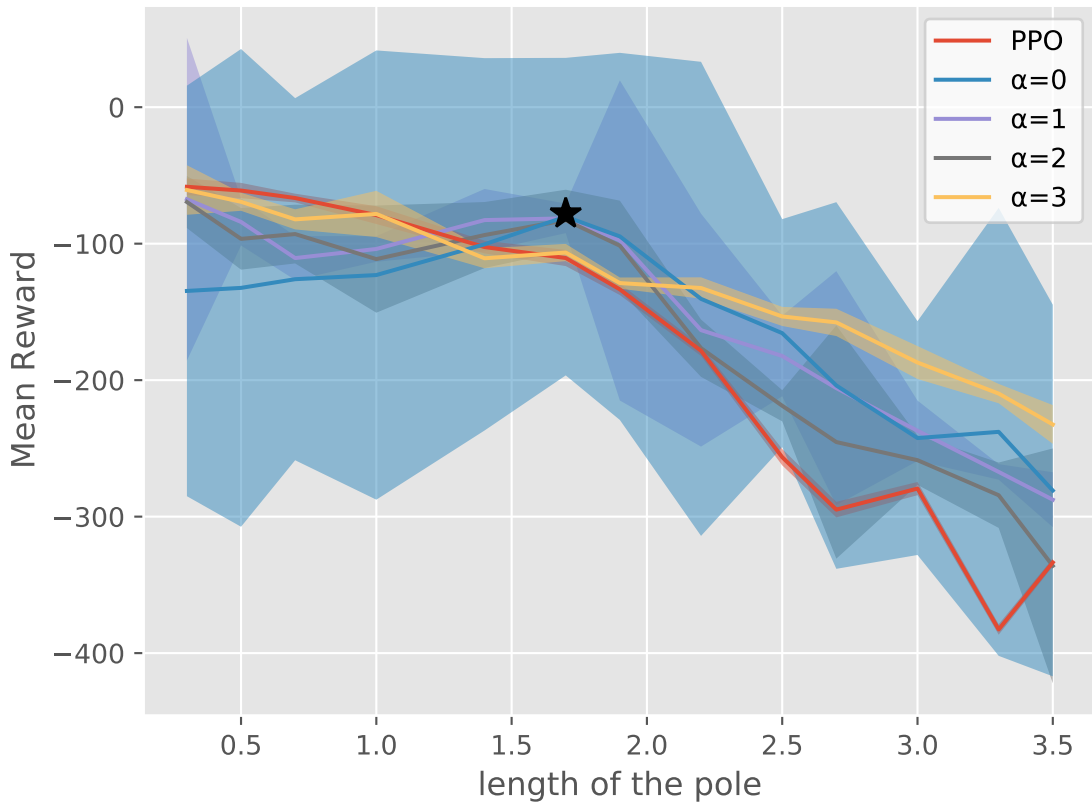

Supplement: supplementary_material [file attachment]

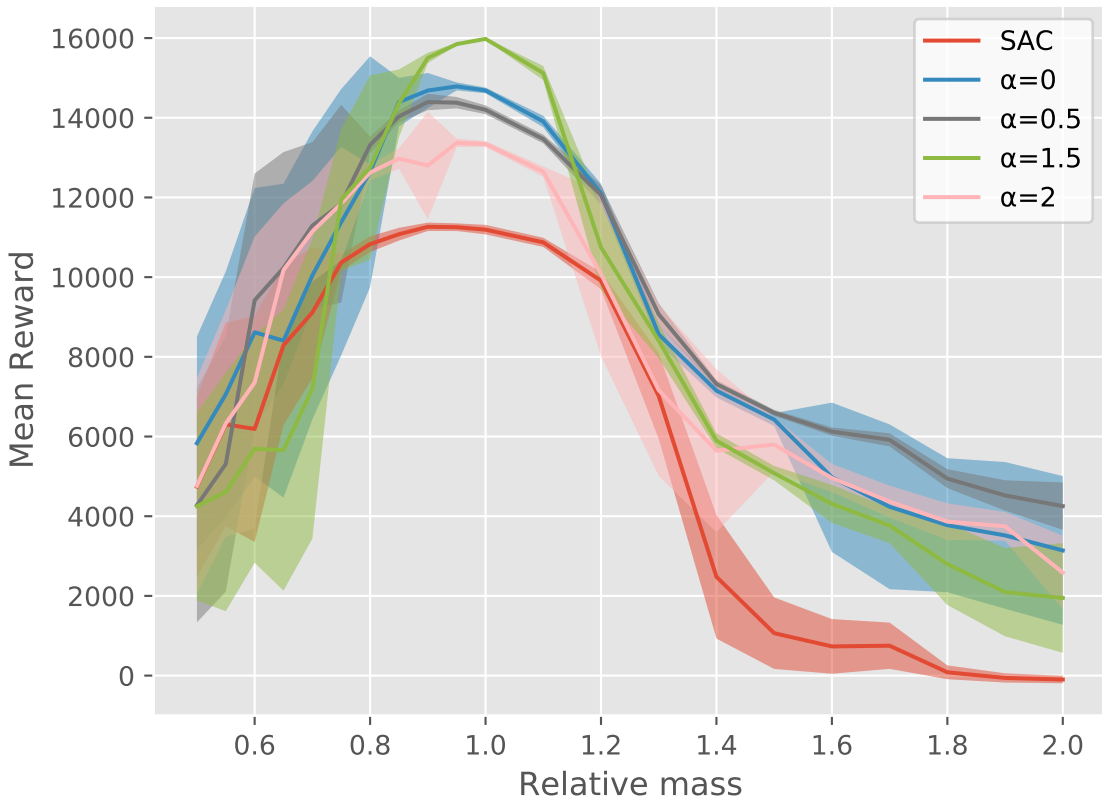

Supplement: supplementary_material [file attachment]

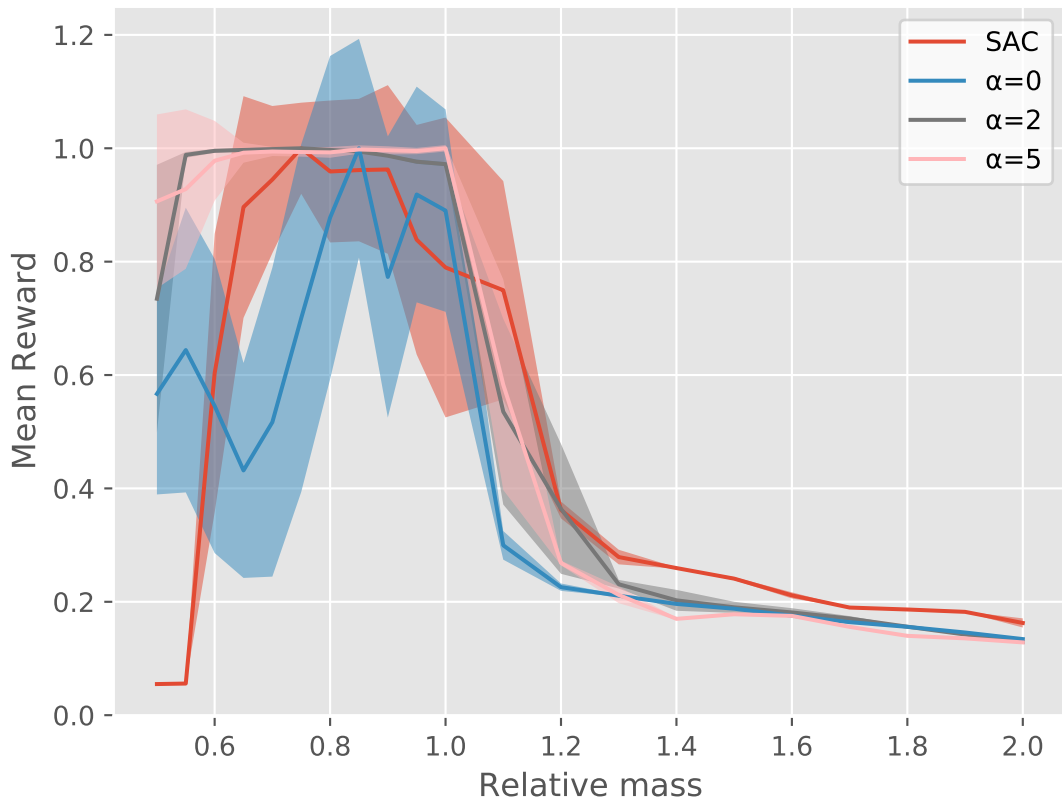

Supplement: supplementary_material [file attachment]

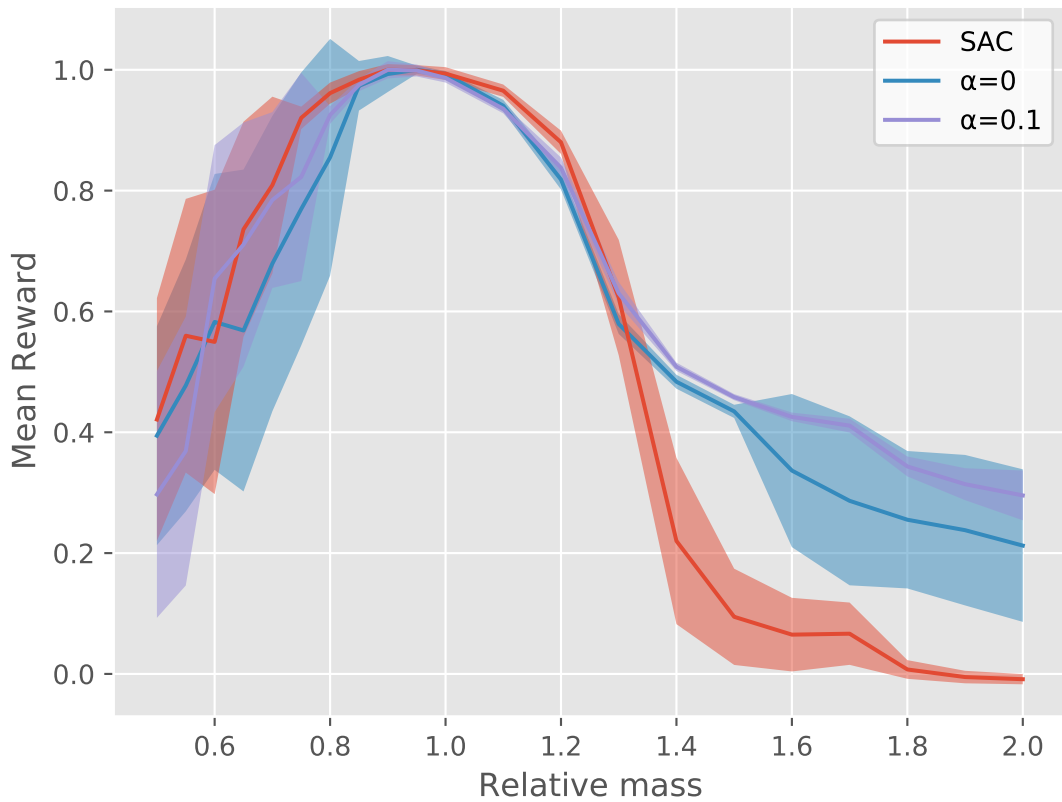

Supplement: supplementary_material [file attachment]

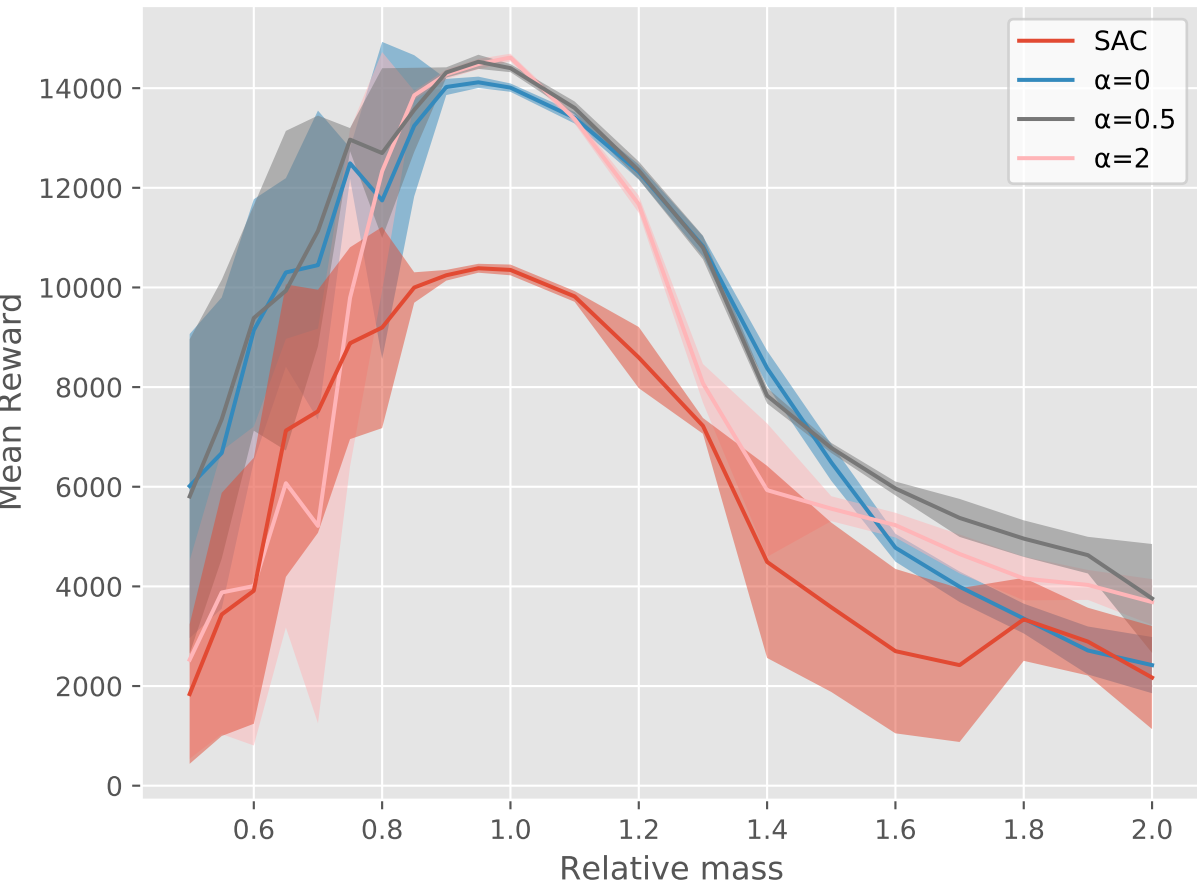

Supplement: supplementary_material [file attachment]

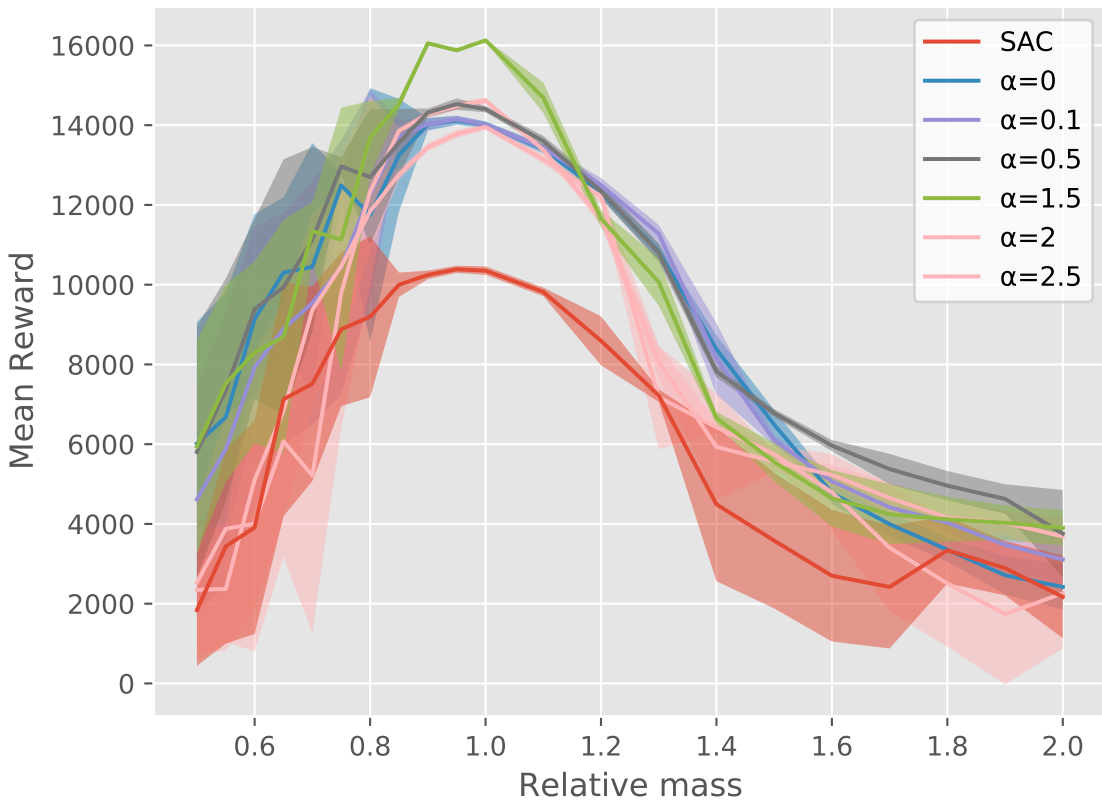

Supplement: supplementary_material [file attachment]

Mean Reward of 20 trajectories  $\pm$  standard deviation



Supplement: supplementary_material [file attachment]

Mean Reward of 20 trajectories  $\pm$  standard deviation

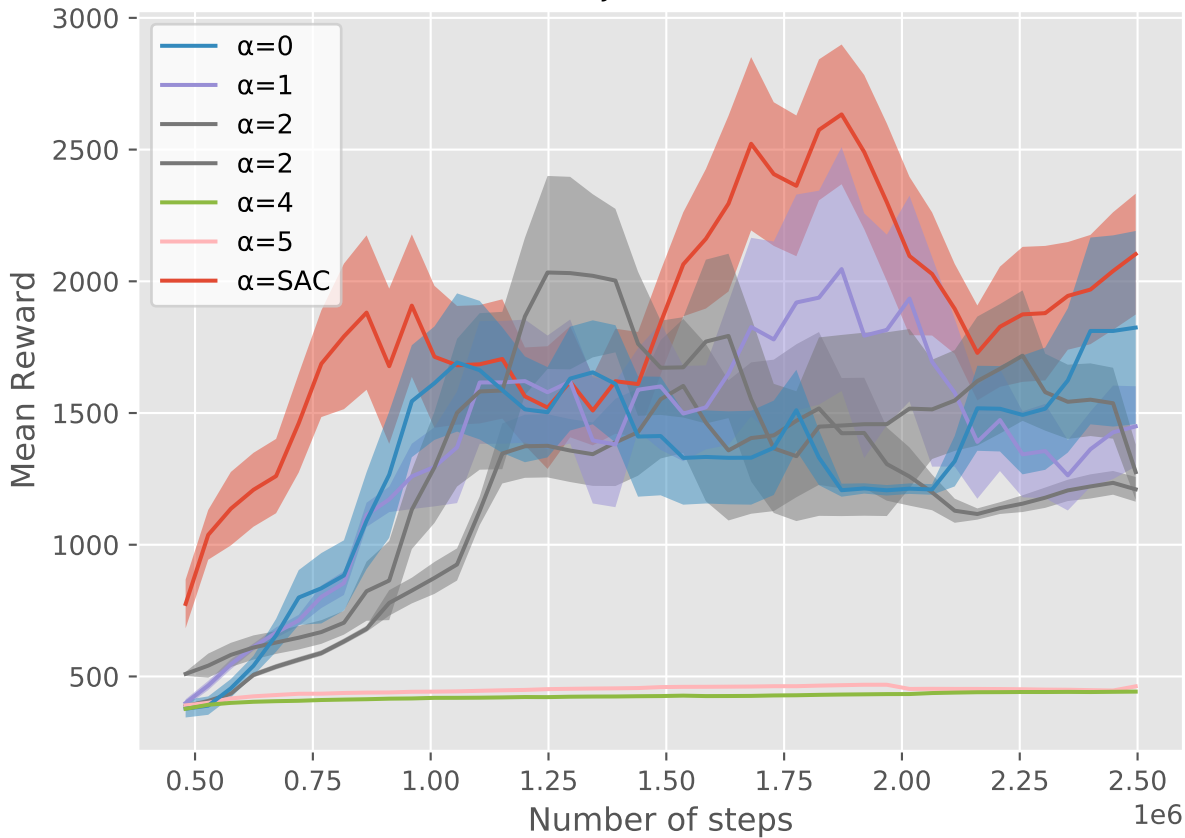

Supplement: supplementary_material [file attachment]

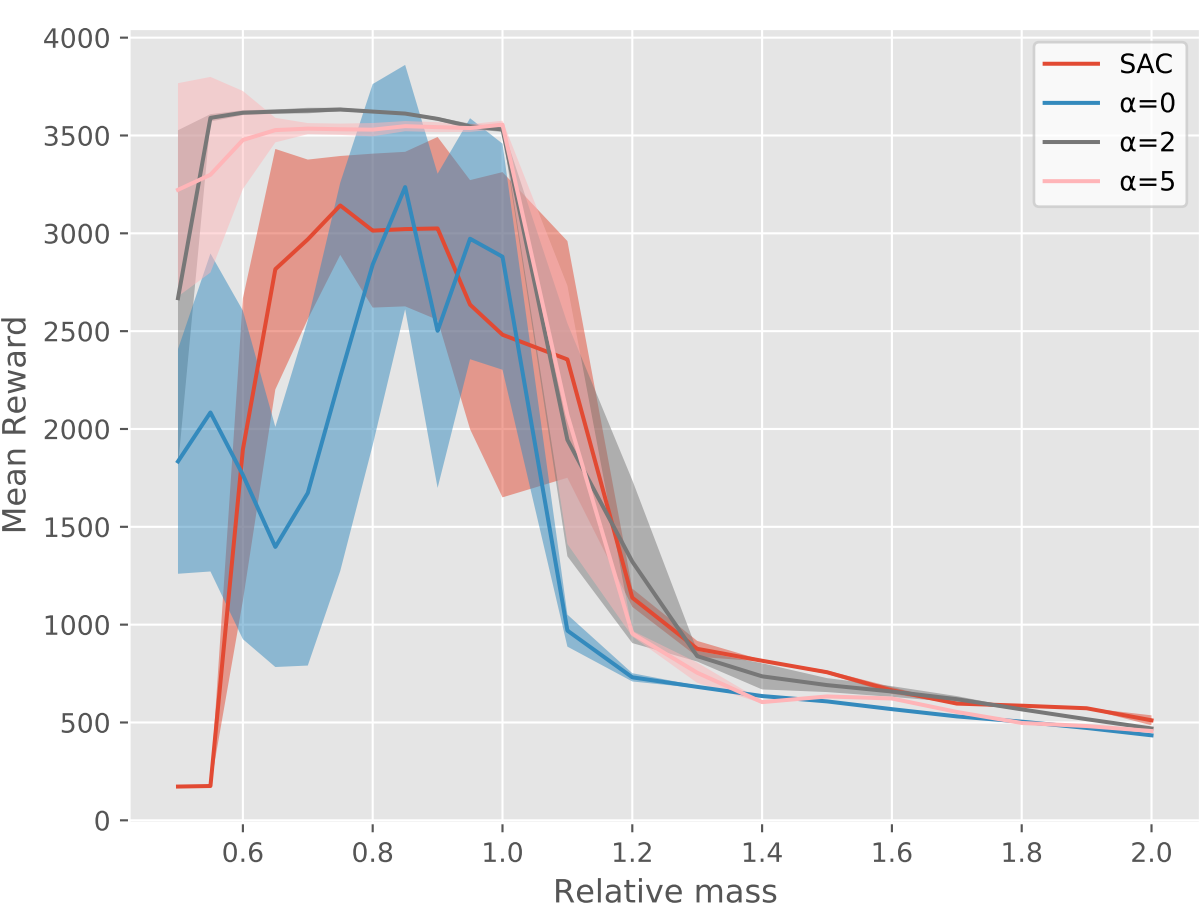

Supplement: supplementary_material [file attachment]

Mean Reward of 20 trajectories  $\pm$  standard deviation

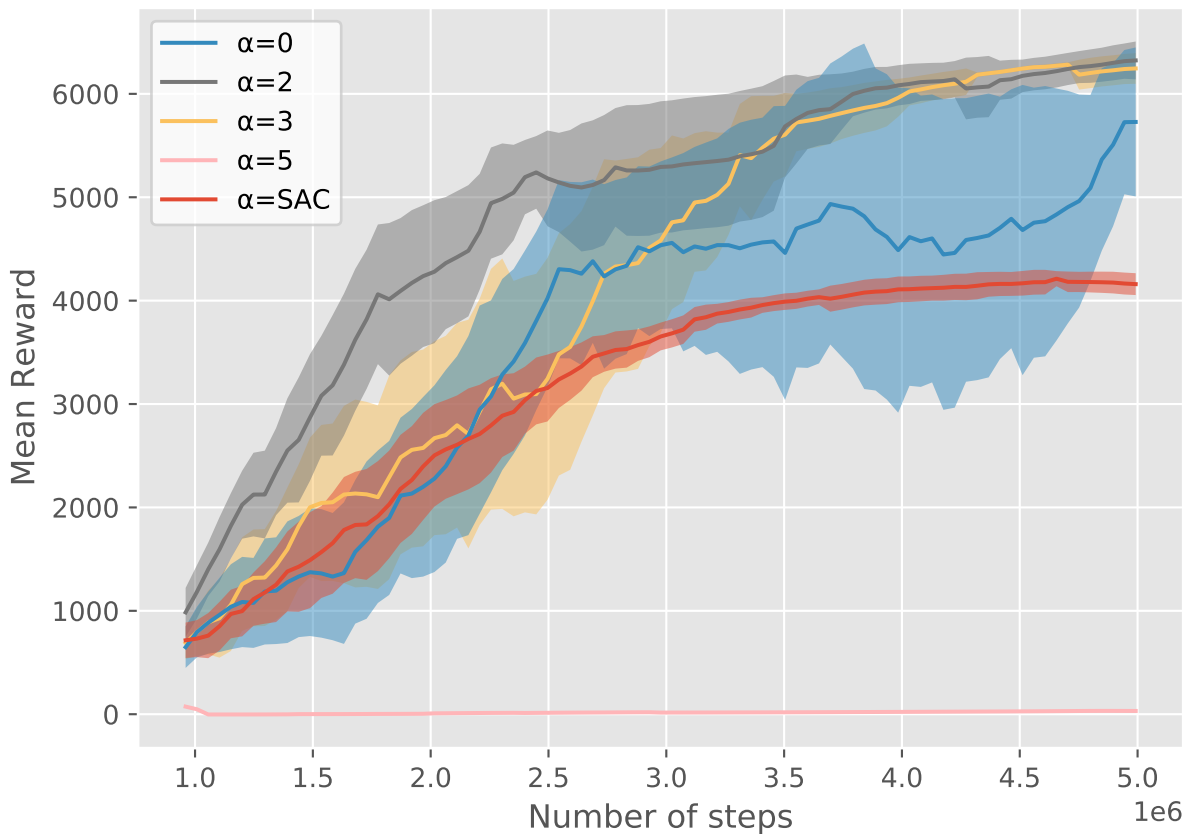

Supplement: supplementary_material [file attachment]

Mean Reward of 20 trajectories  $\pm$  standard deviation

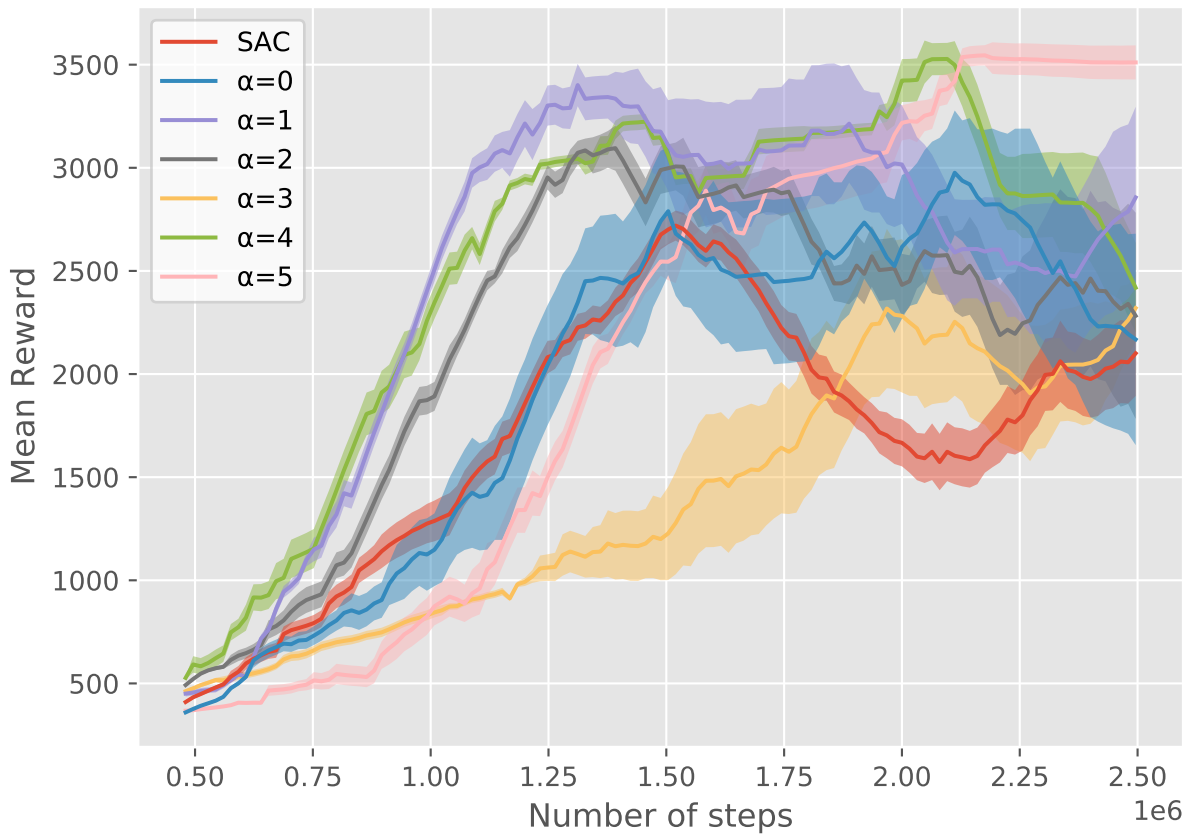

Supplement: supplementary_material [file attachment]

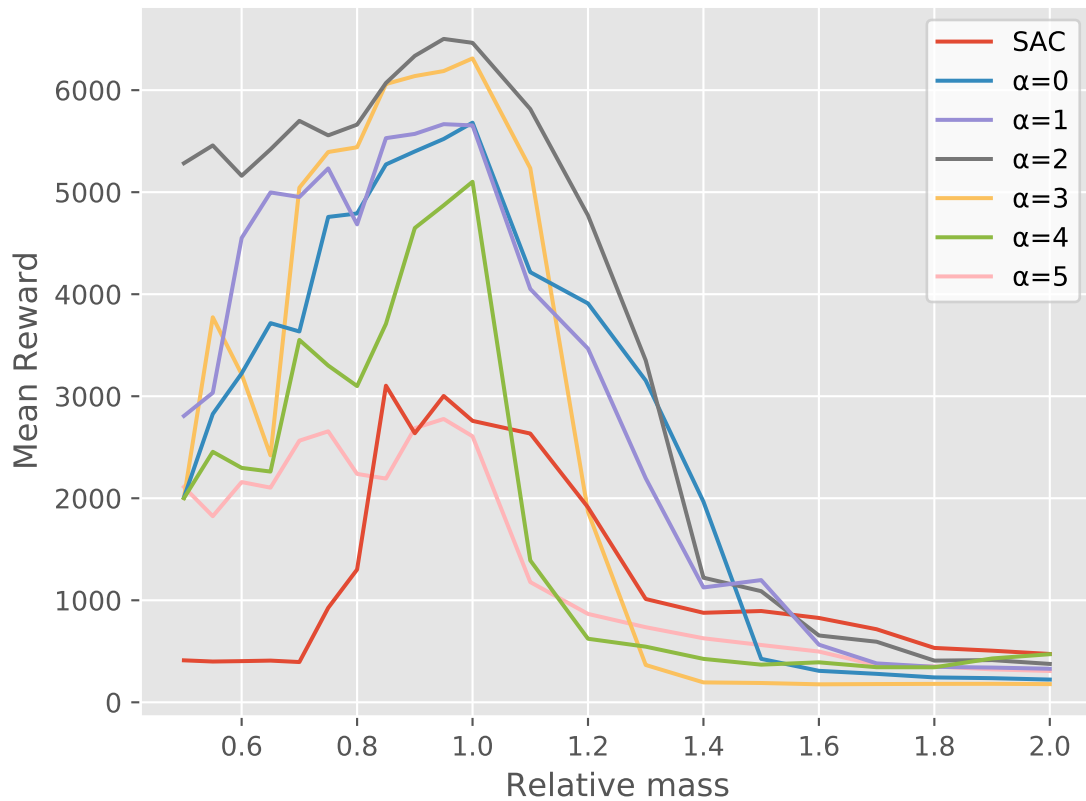

Supplement: supplementary_material [file attachment]

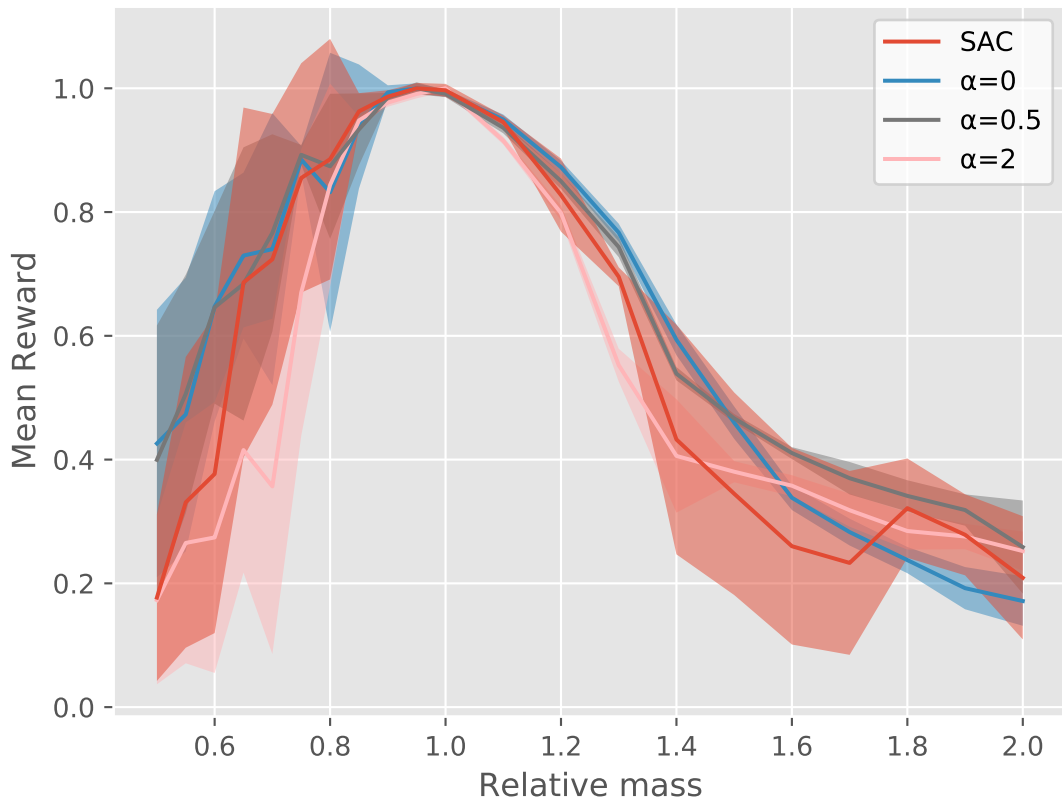

Supplement: supplementary_material [file attachment]

Mean Reward

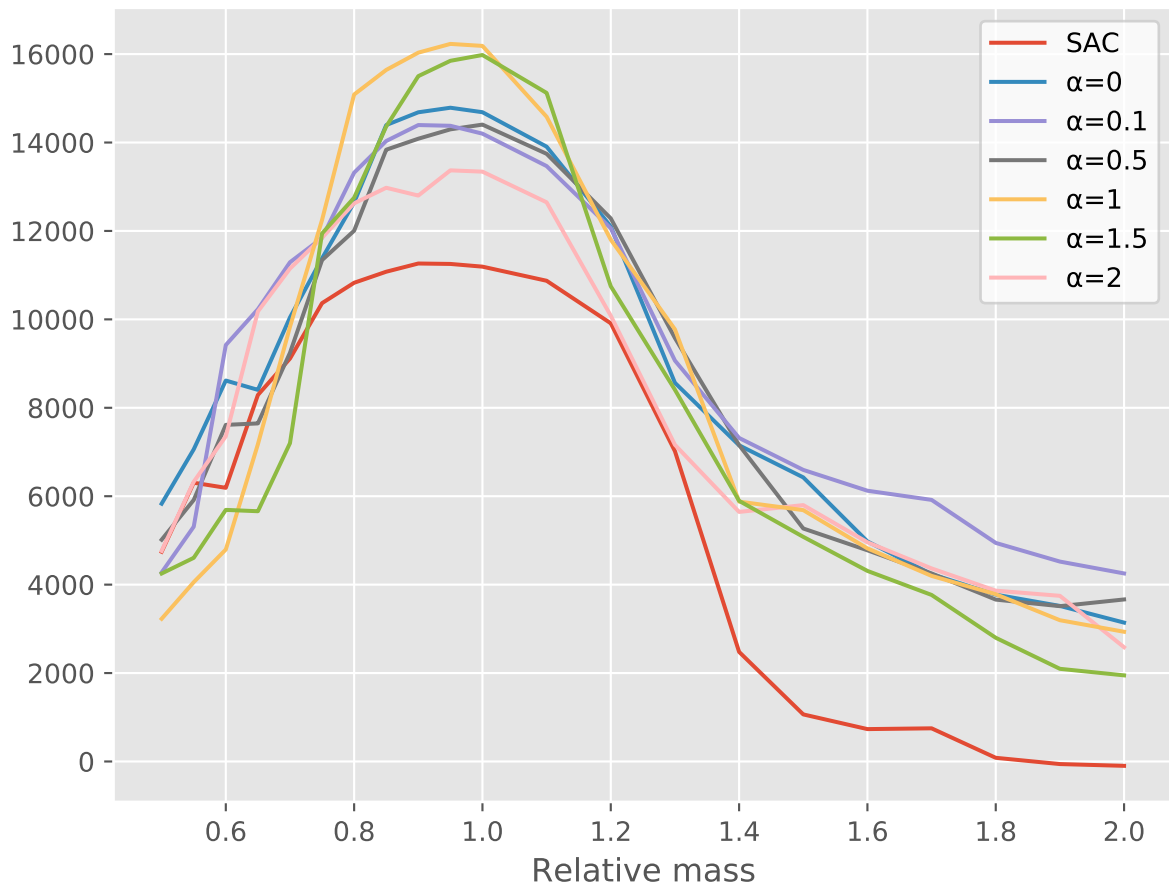

Supplement: supplementary_material [file attachment]

Mean Reward

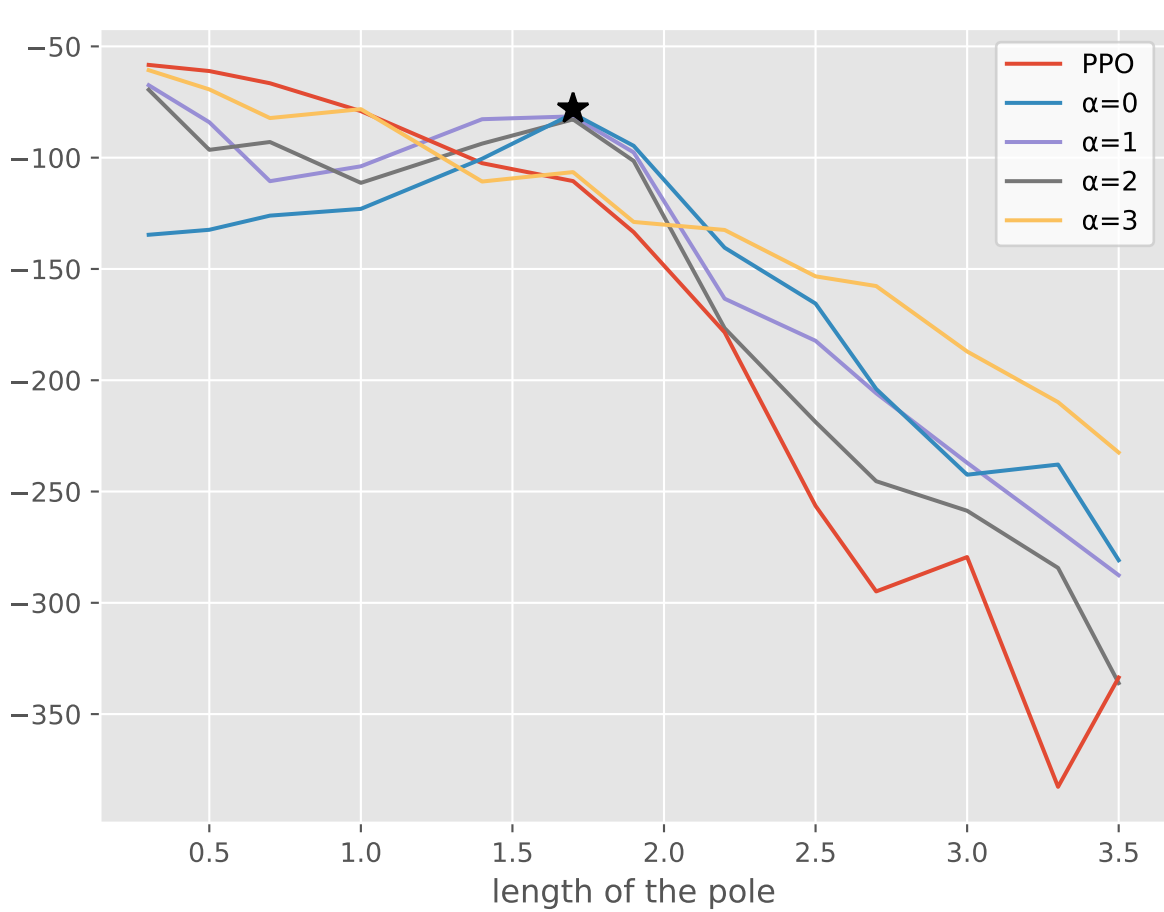

Supplement: supplementary_material [file attachment]

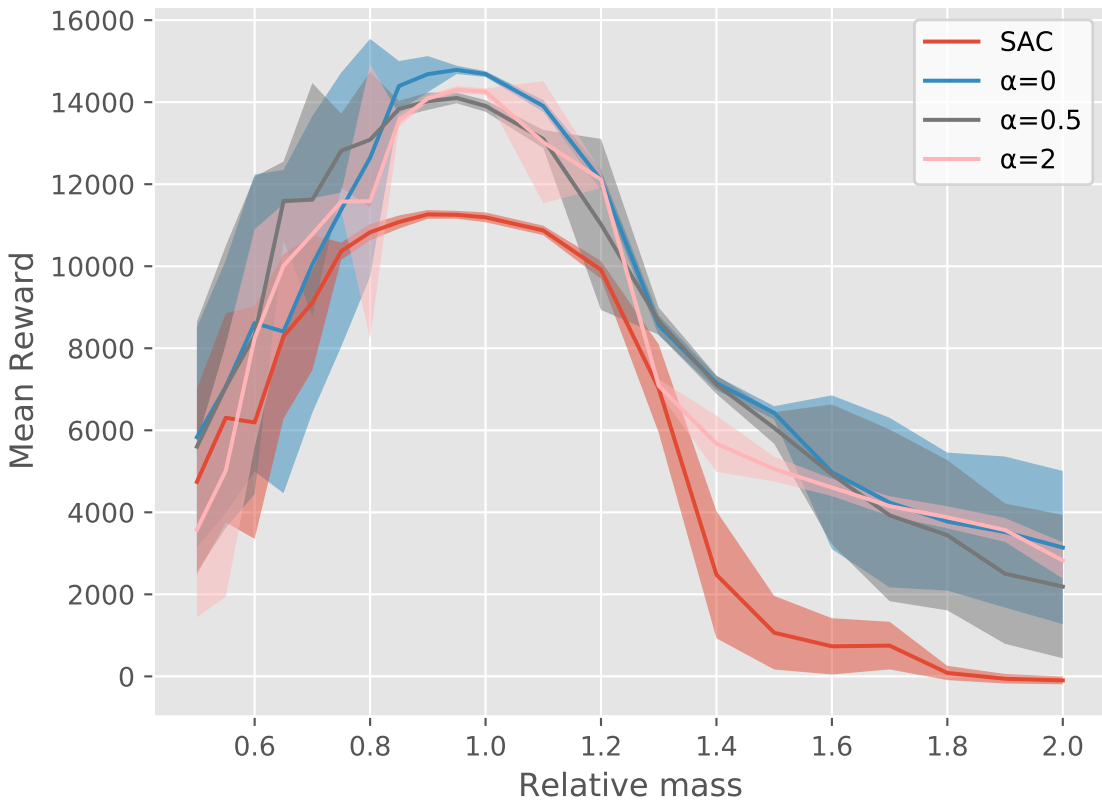

Supplement: supplementary_material [file attachment]

Mean Reward of 20 trajectories  $\pm$  standard deviation

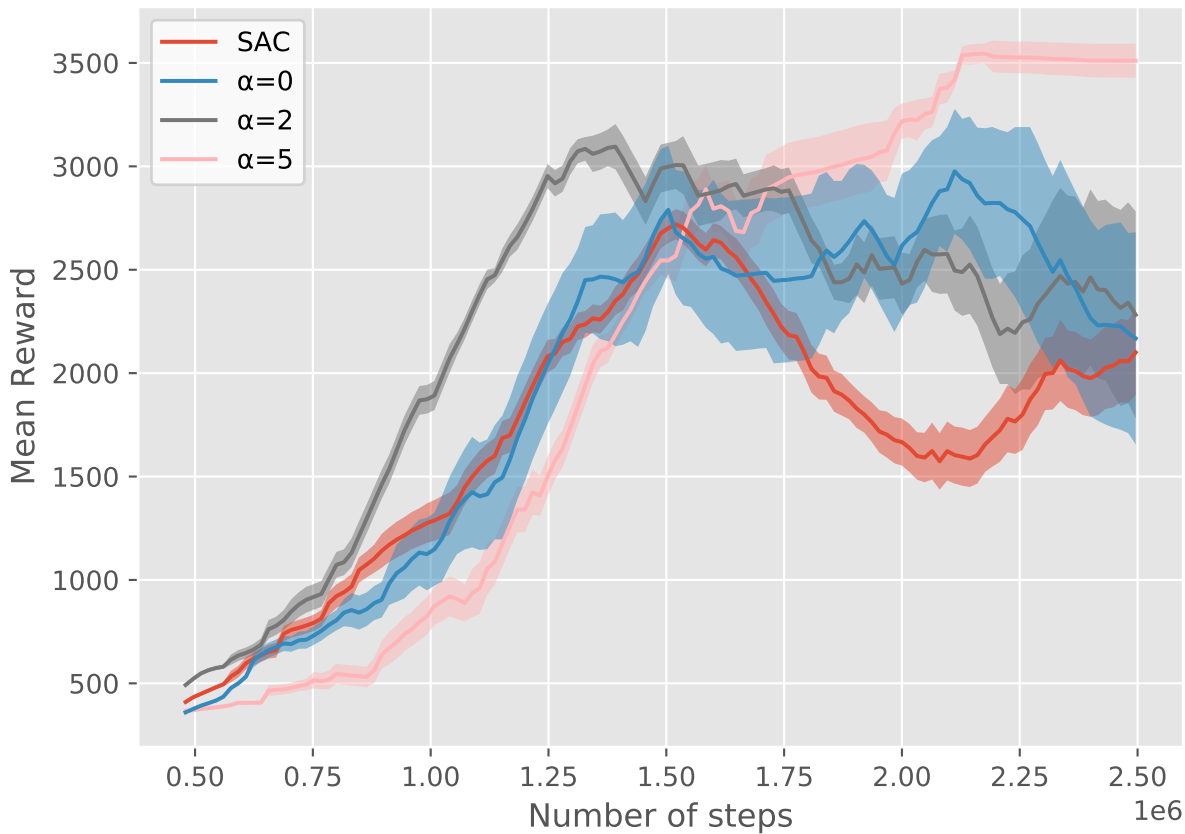

Supplement: supplementary_material [file attachment]

Mean Reward of 20 trajectories  $\pm$  standard deviation

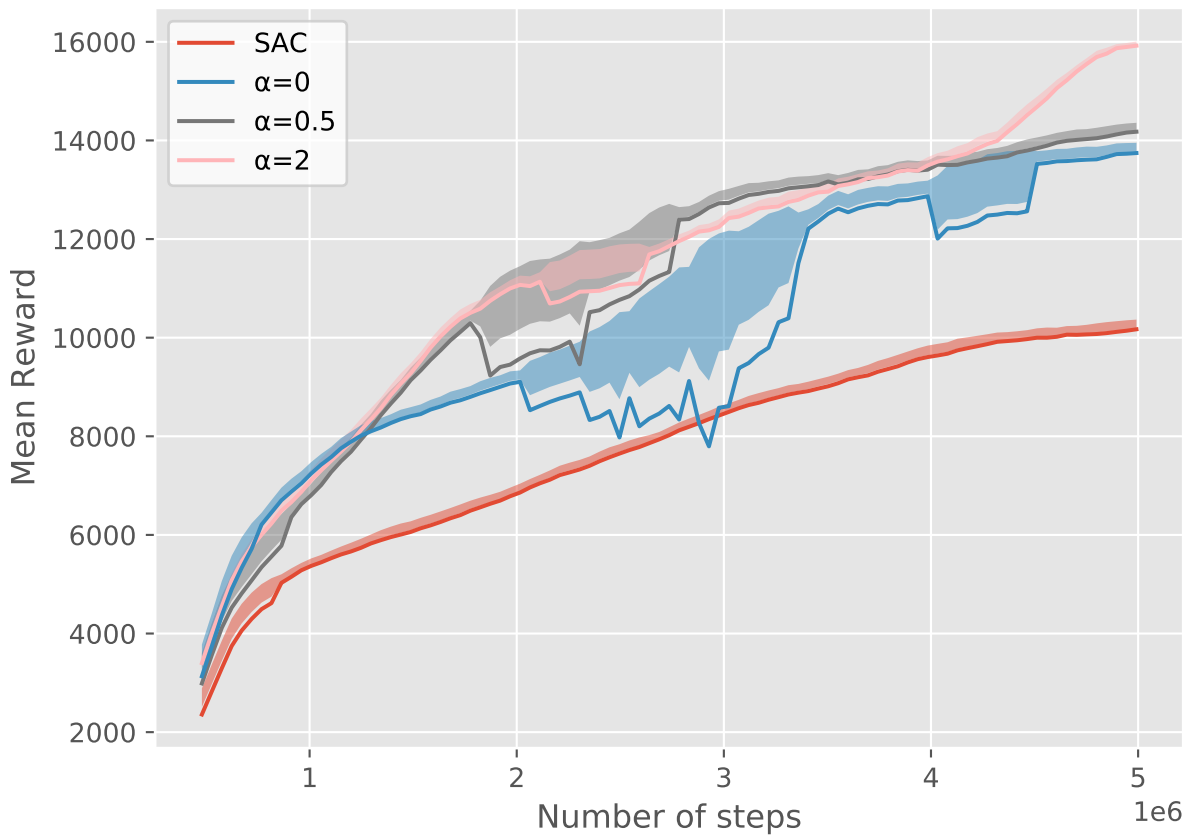

Supplement: supplementary_material [file attachment]

Mean Reward of 20 trajectories  $\pm$  standard deviation



Supplement: supplementary_material [file attachment]

Mean Reward of 20 trajectories  $\pm$  standard deviation

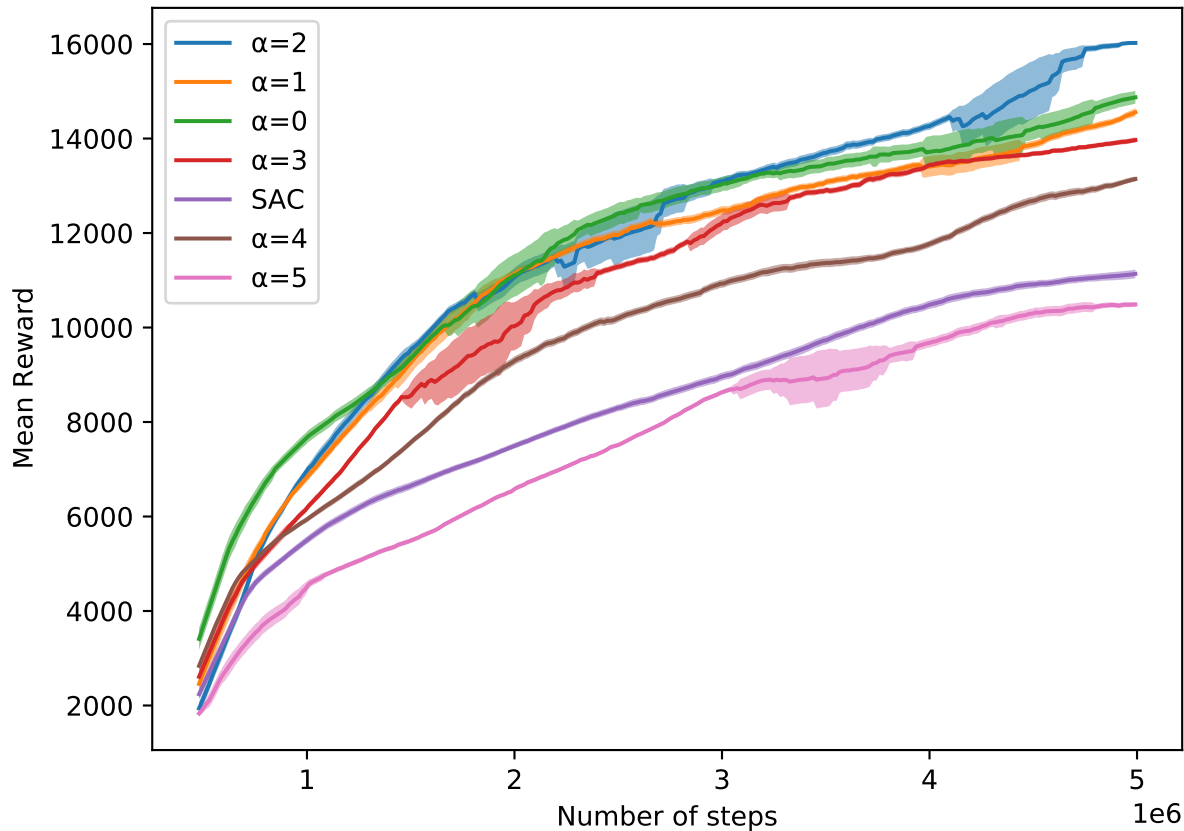

Supplement: supplementary_material [file attachment]

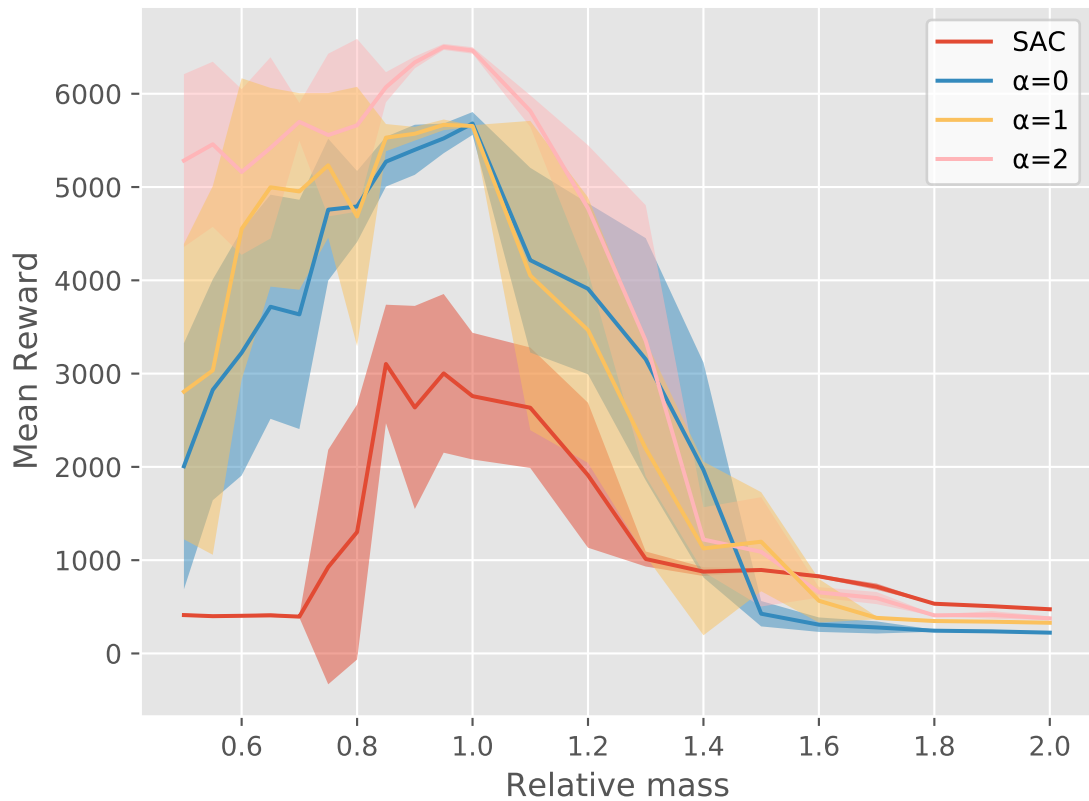

Supplement: supplementary_material [file attachment]

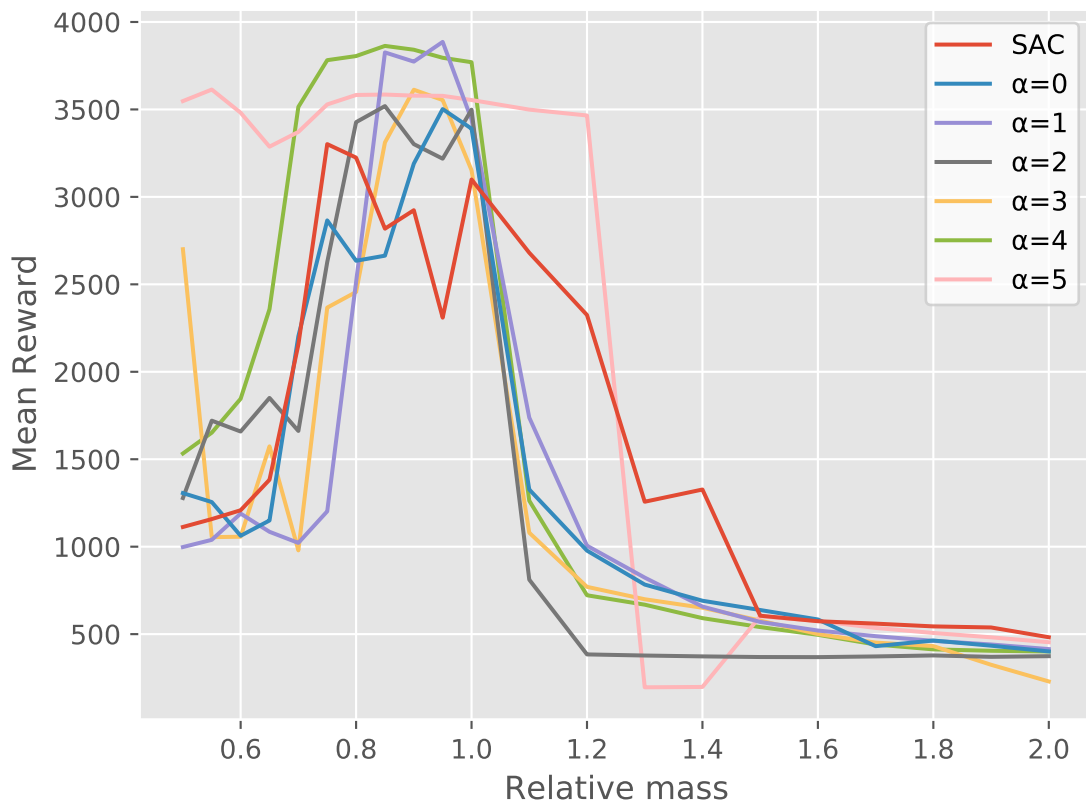

Supplement: supplementary_material [file attachment]

Mean Reward of 20 trajectories  $\pm$  standard deviation

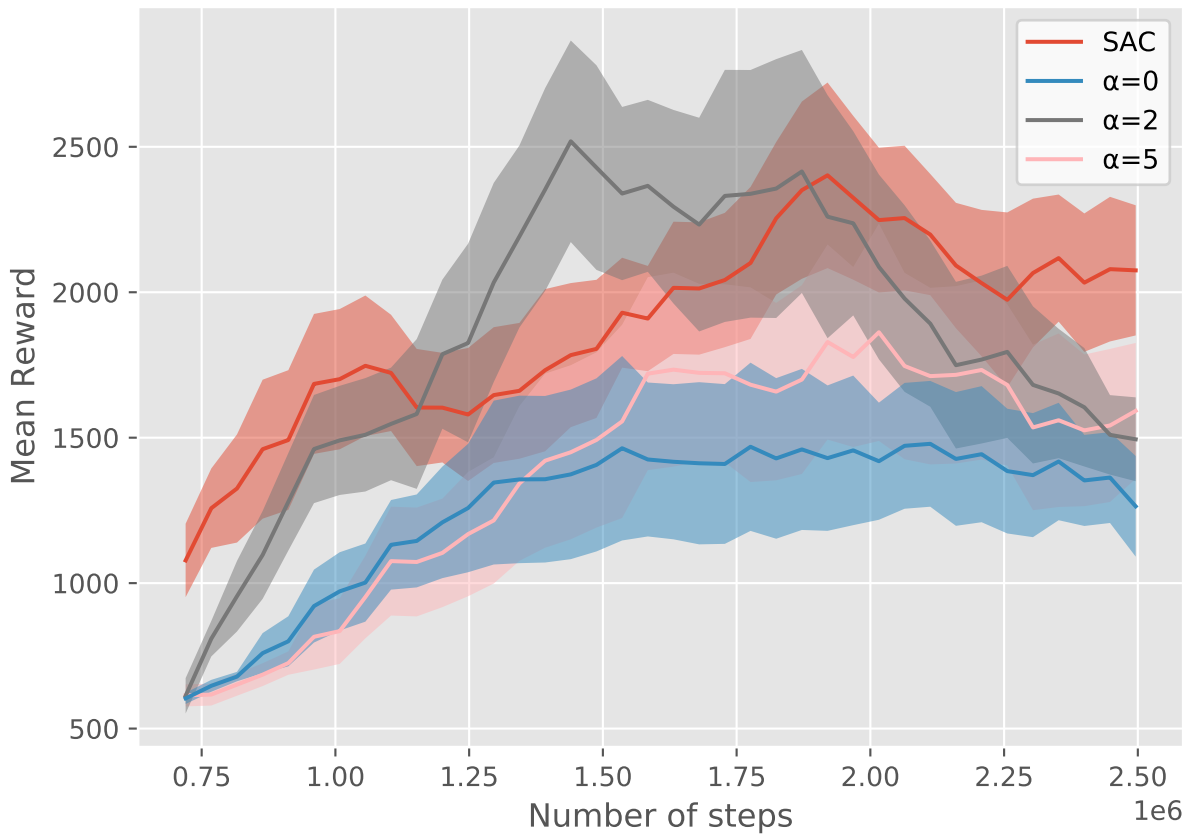

Supplement: supplementary_material [file attachment]

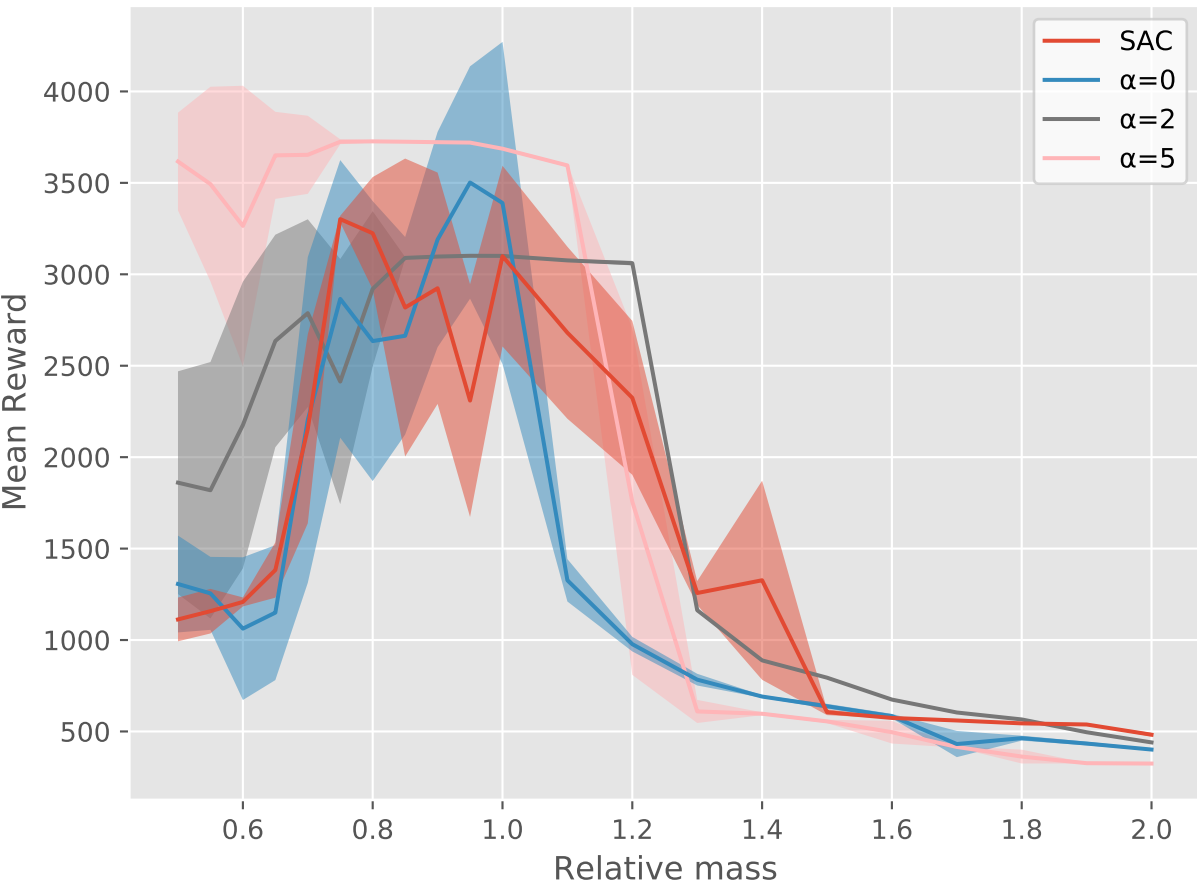

Supplement: supplementary_material [file attachment]

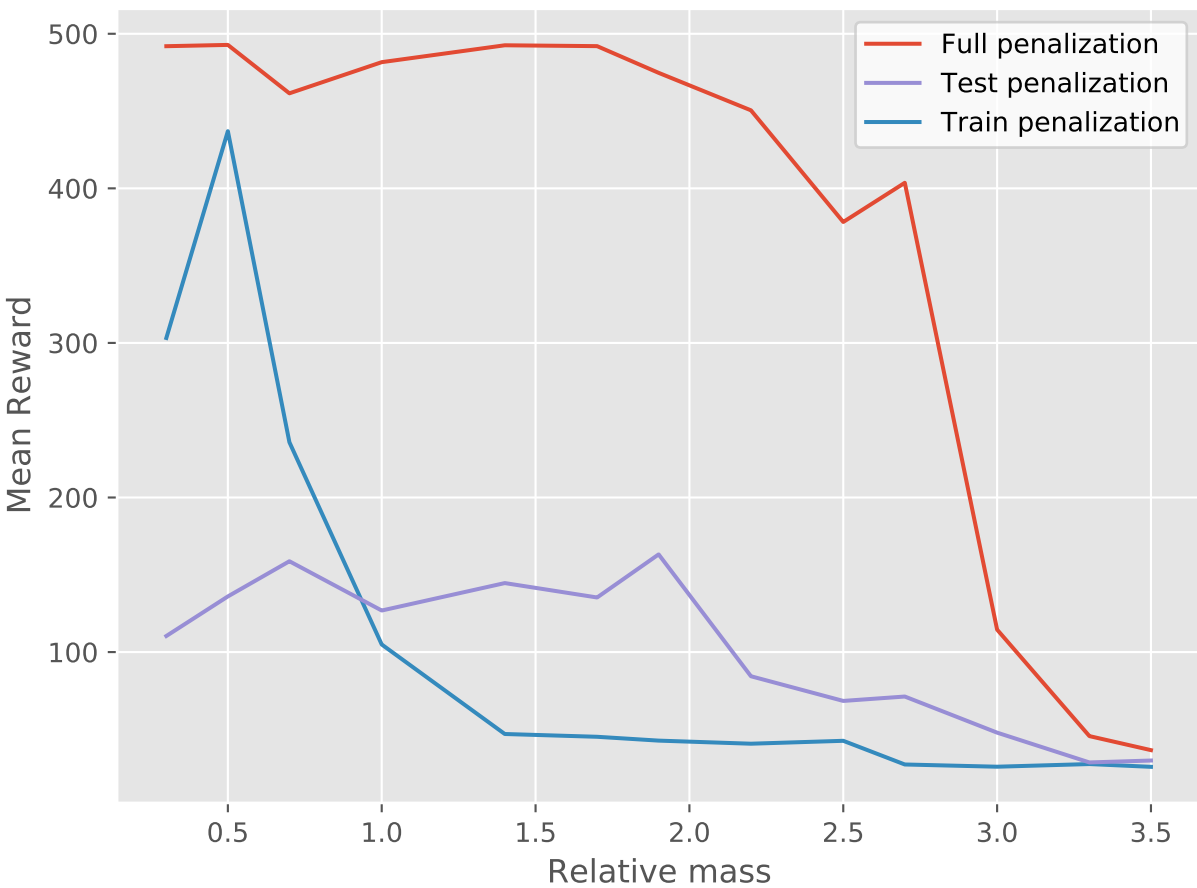

Supplement: supplementary_material [file attachment]

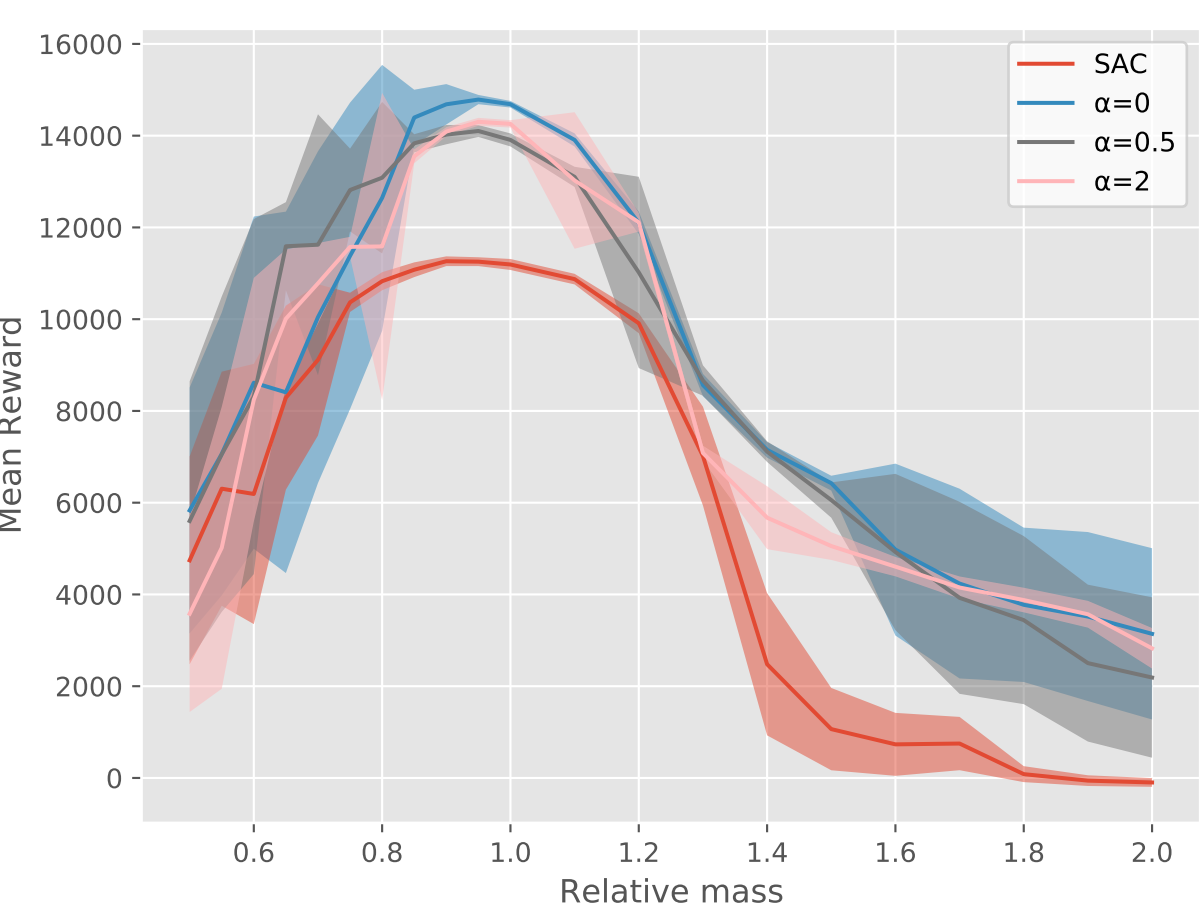

Supplement: supplementary_material [file attachment]

Mean Reward of 20 trajectories  $\pm$  standard deviation

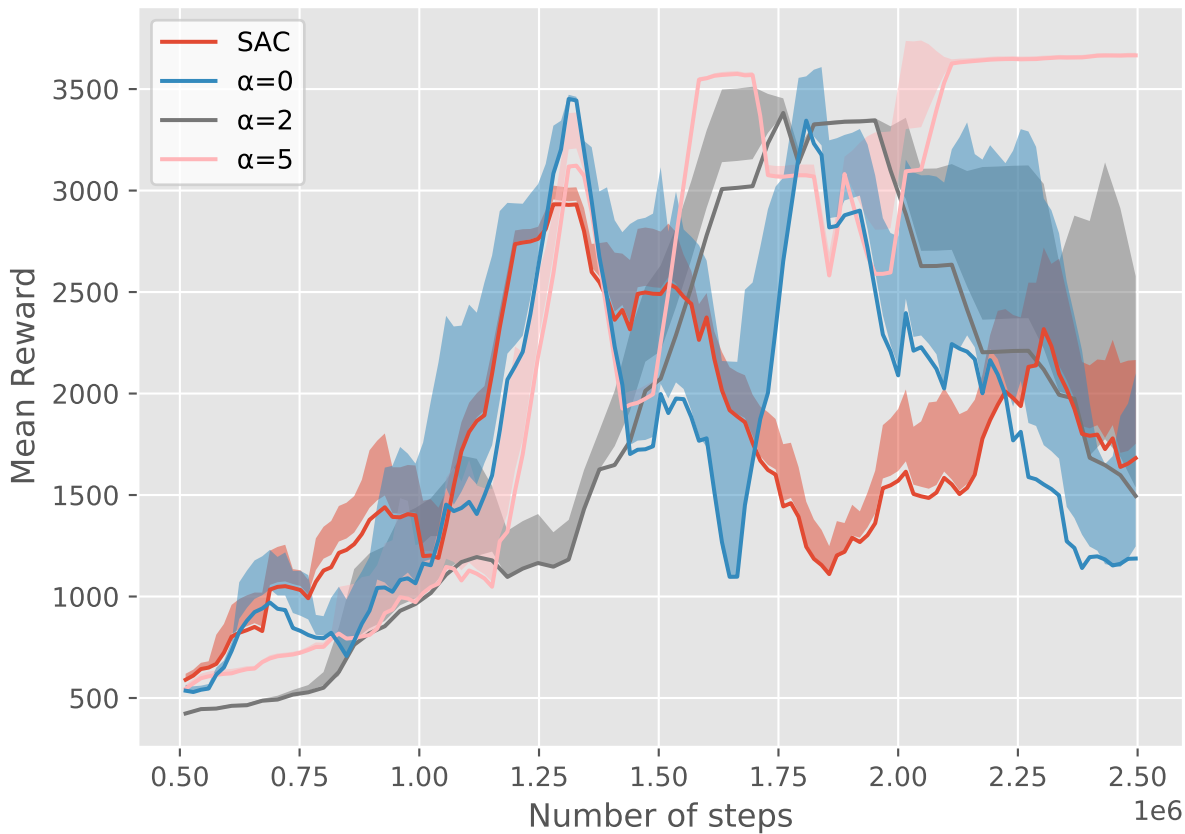

Supplement: supplementary_material [file attachment]

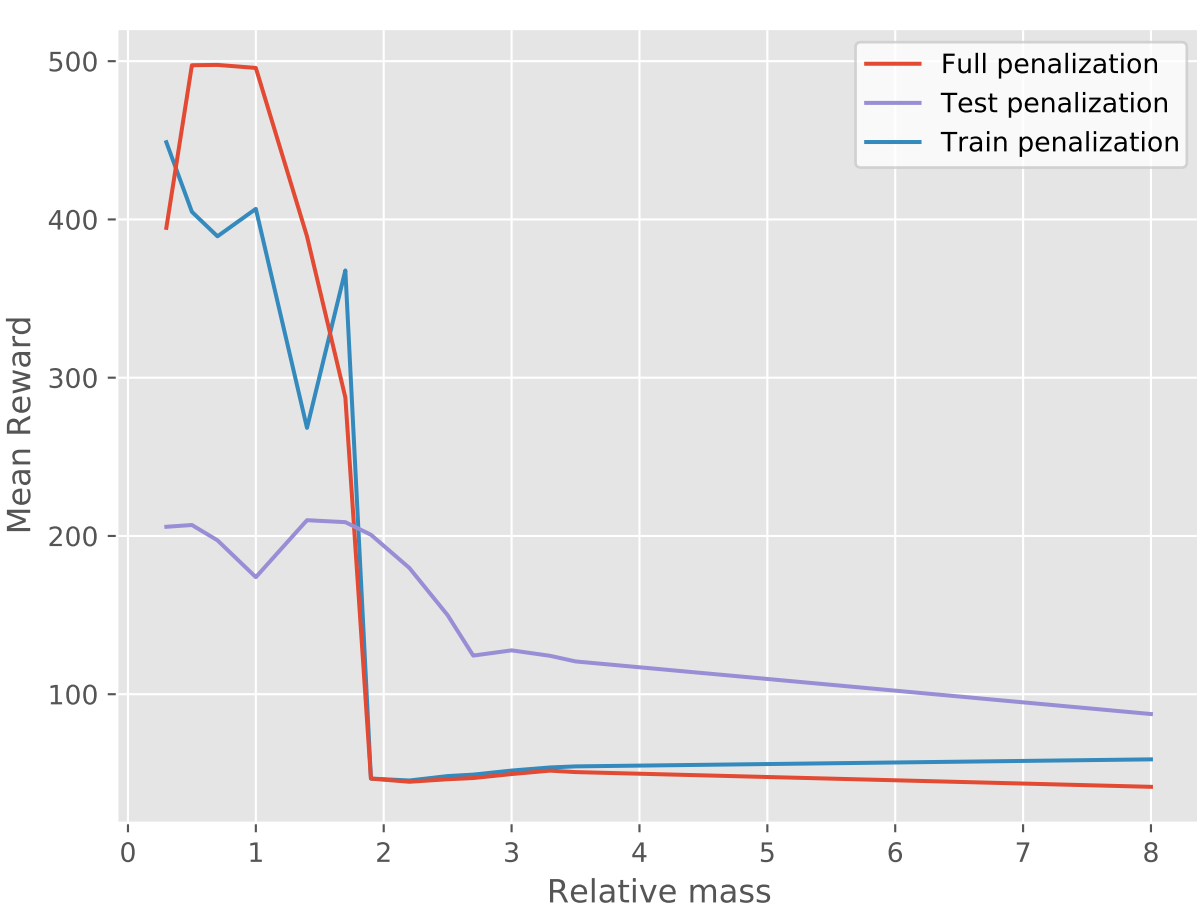

Supplement: supplementary_material [file attachment]

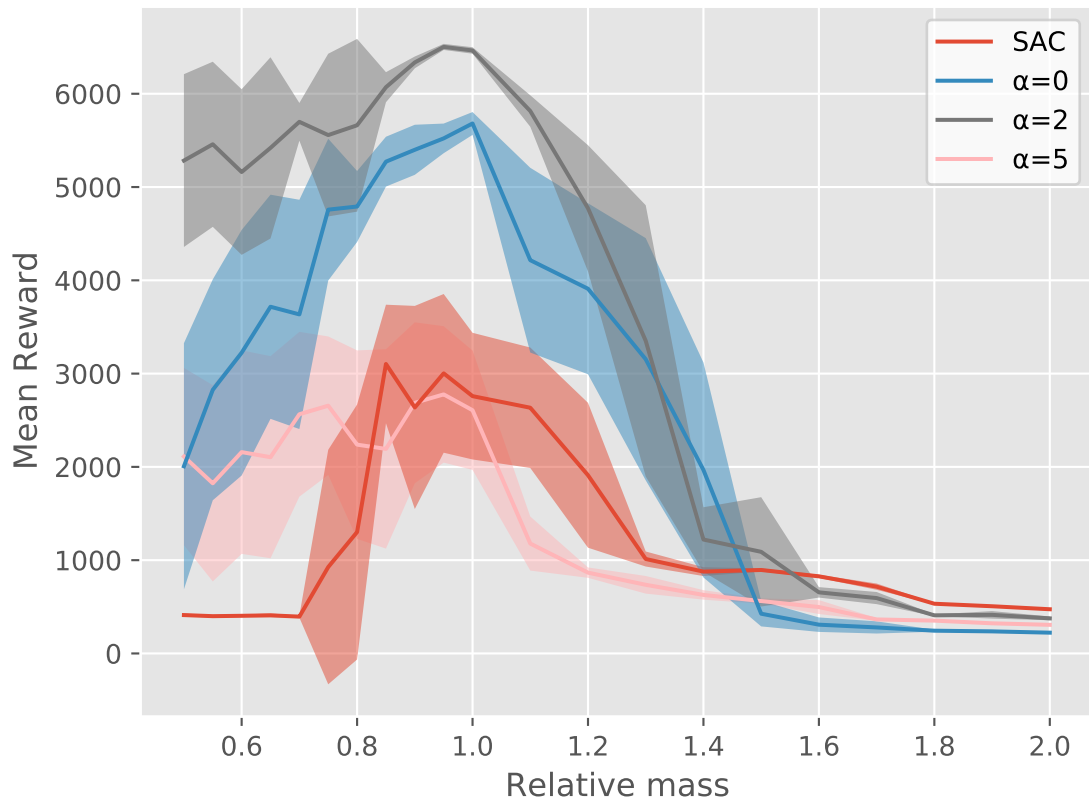

Supplement: supplementary_material [file attachment]

Mean Reward of 20 trajectories  $\pm$  standard deviation

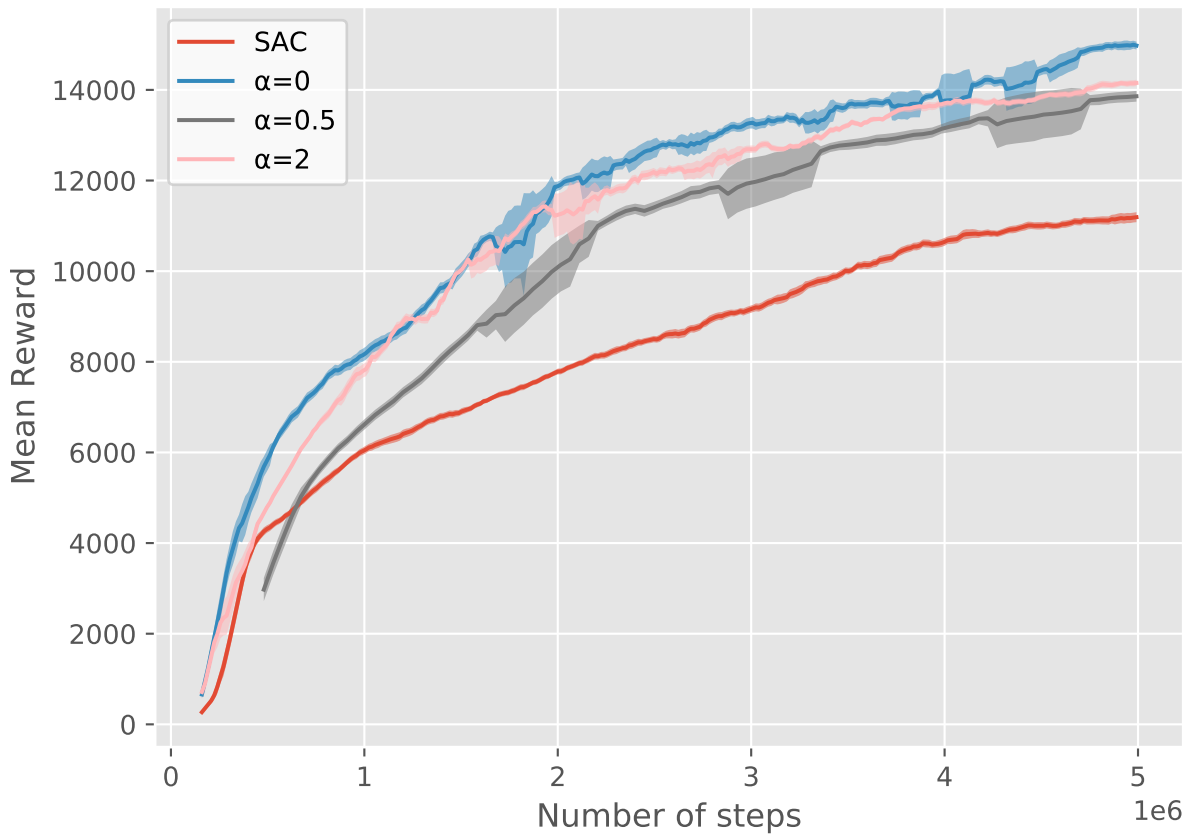

Supplement: supplementary_material [file attachment]

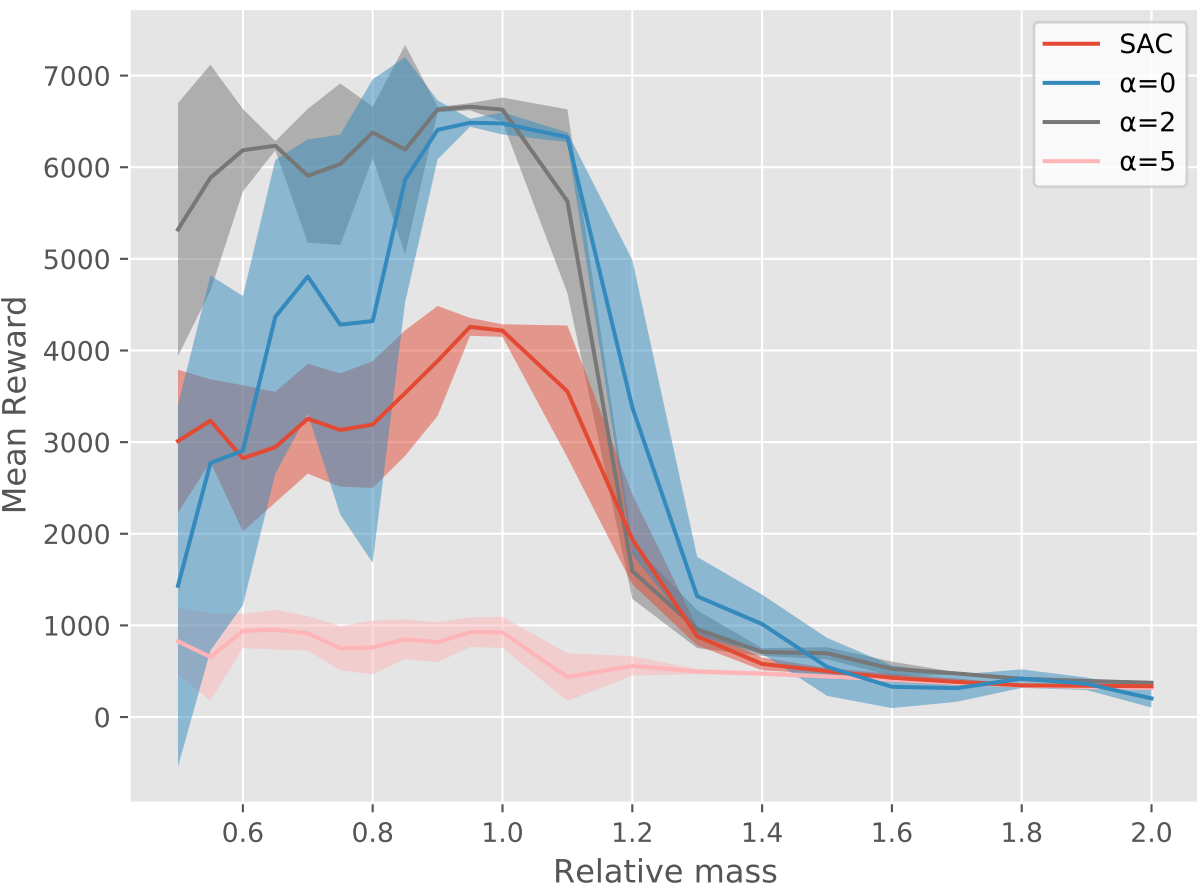

Supplement: supplementary_material [file attachment]

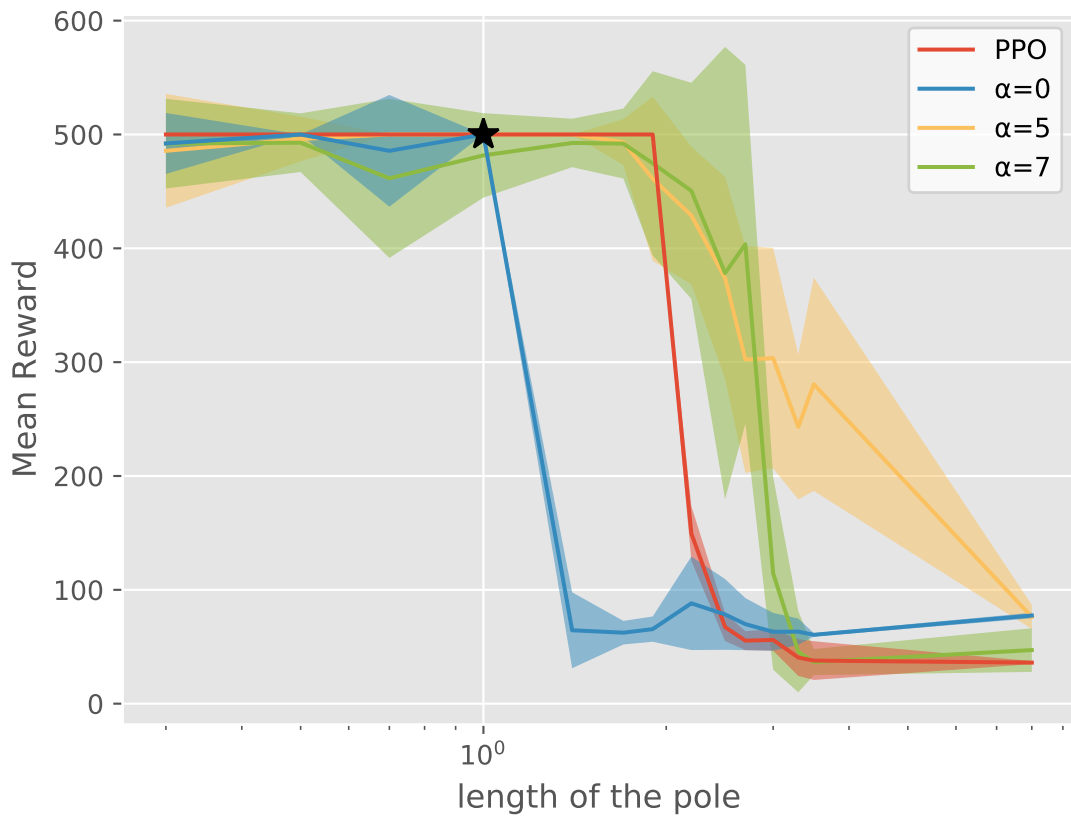

Supplement: supplementary_material [file attachment]

Mean Reward of 20 trajectories  $\pm$  standard deviation

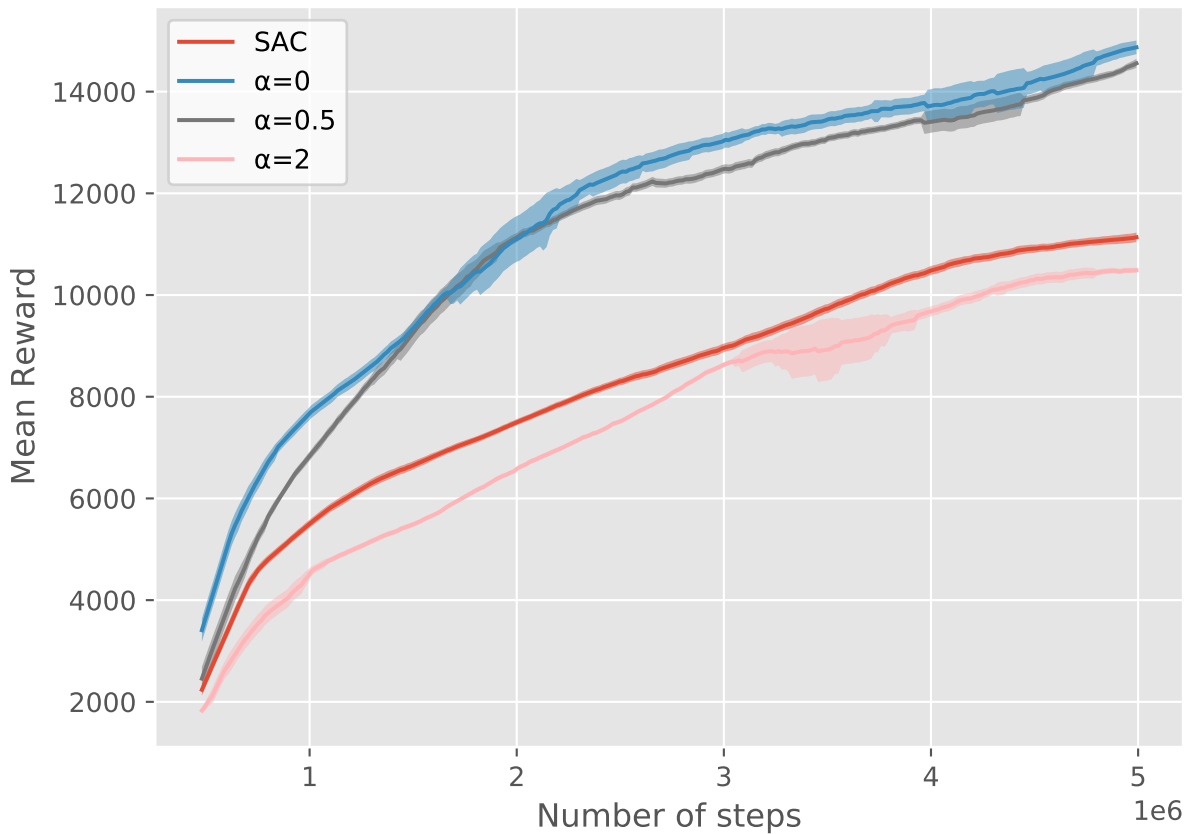

Supplement: supplementary_material [file attachment]

Mean Reward of 20 trajectories  $\pm$  standard deviation

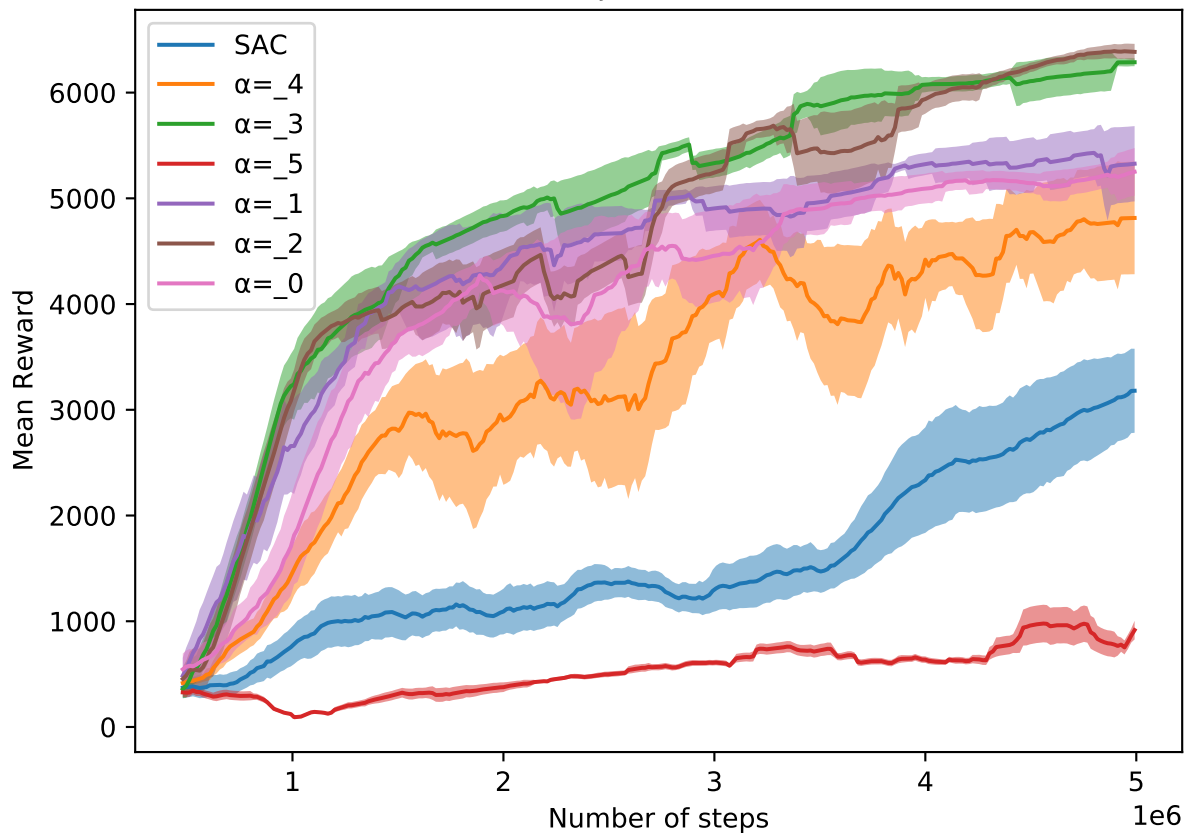

Supplement: supplementary_material [file attachment]

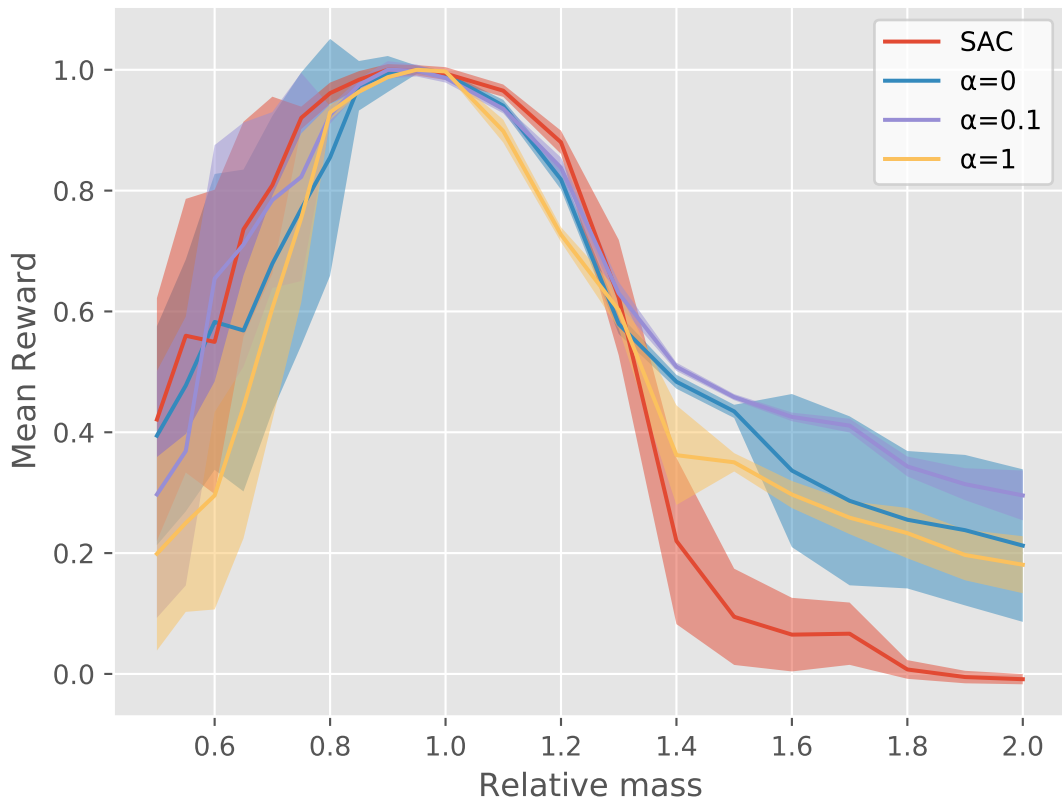

Supplement: supplementary_material [file attachment]

Mean Reward of 20 trajectories  $\pm$  standard deviation

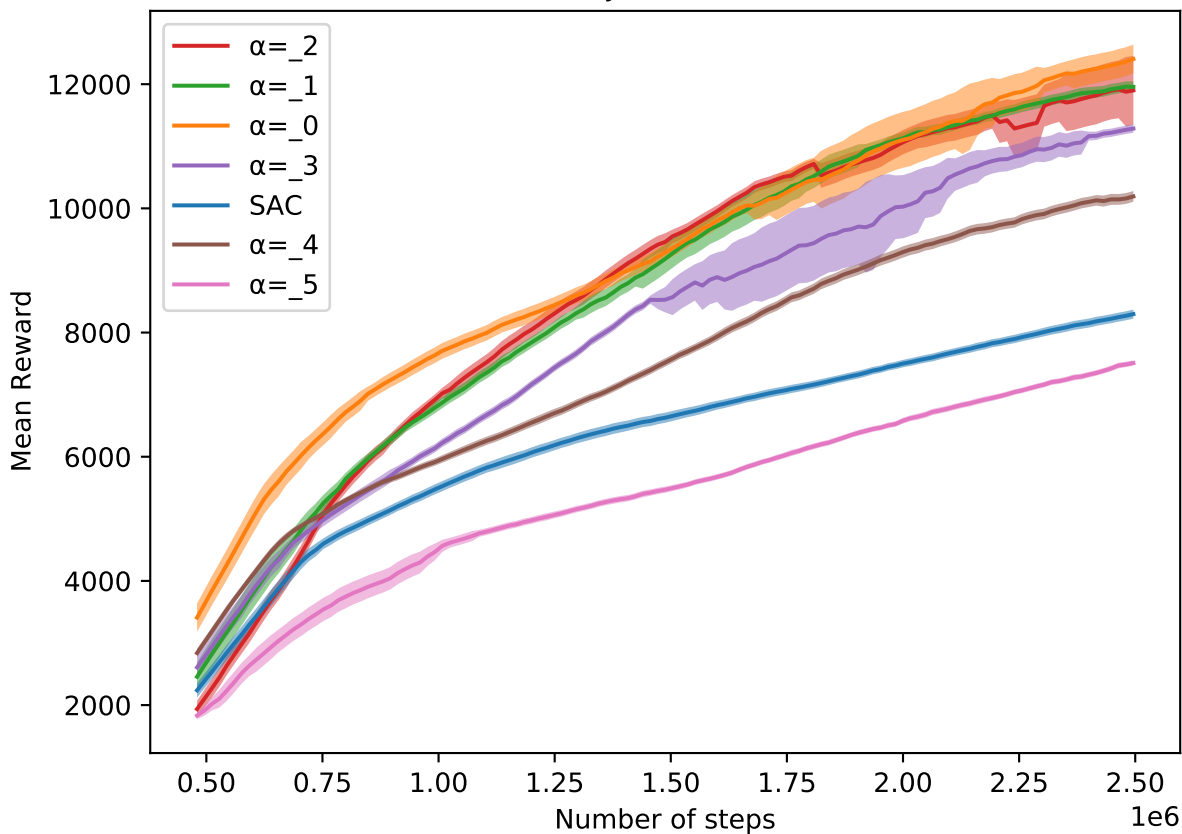

Supplement: supplementary_material [file attachment]

Mean Reward of 20 trajectories  $\pm$  standard deviation

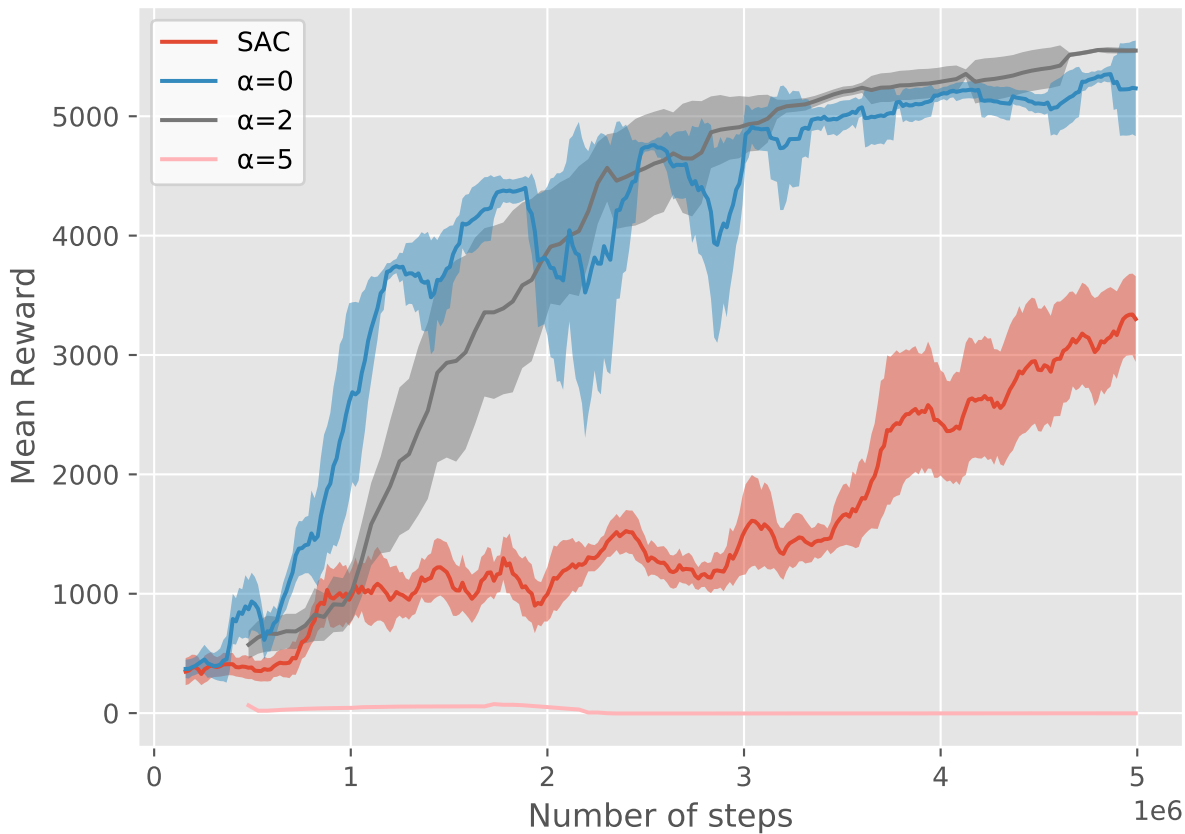

Supplement: supplementary_material [file attachment]

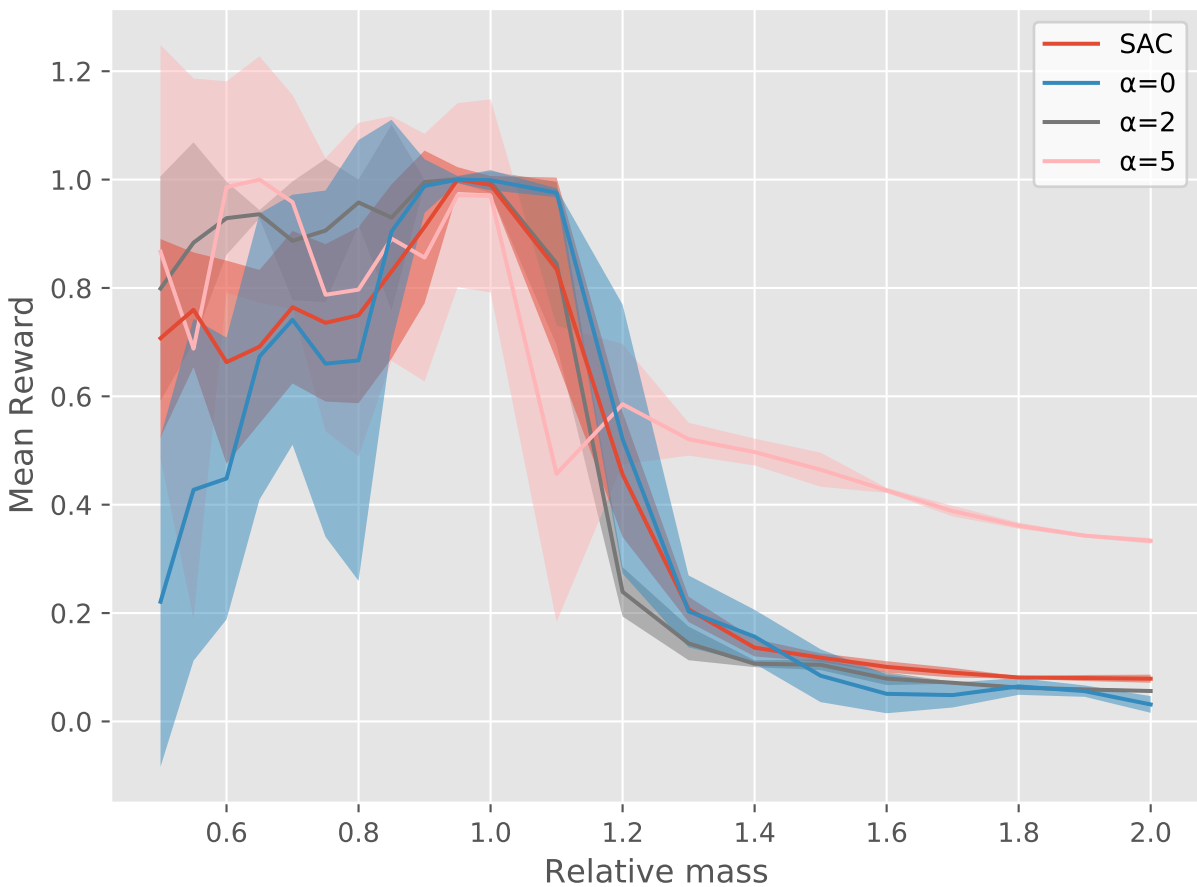

Supplement: supplementary_material [file attachment]

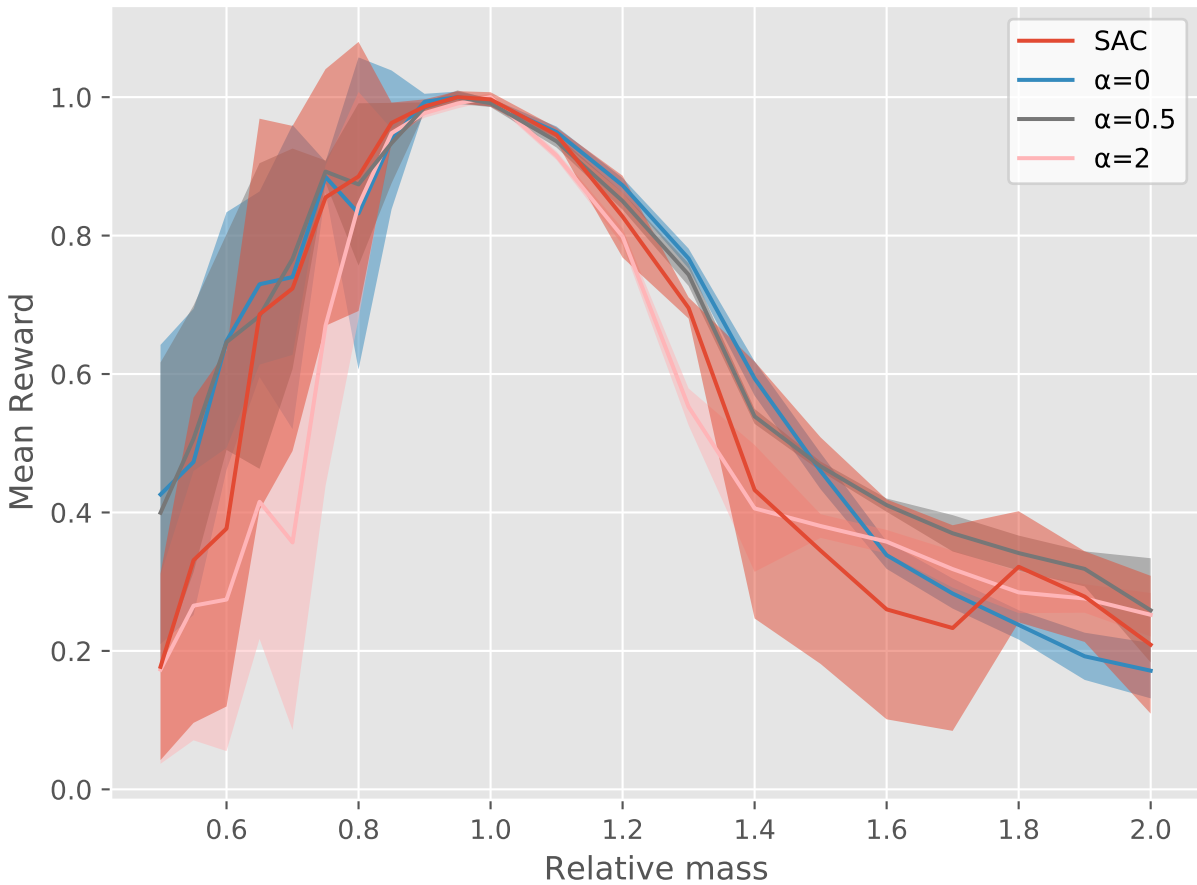

Supplement: supplementary_material [file attachment]

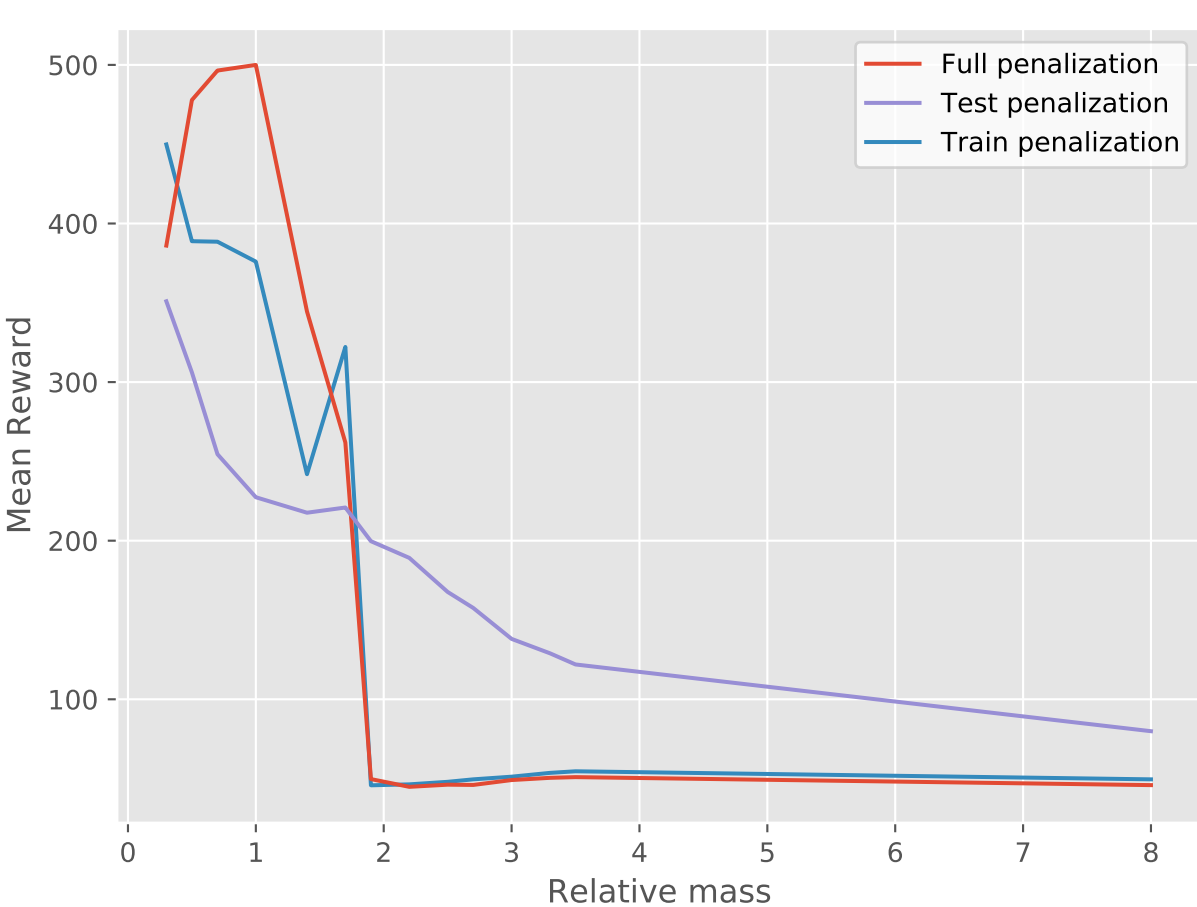

Supplement: supplementary_material [file attachment]

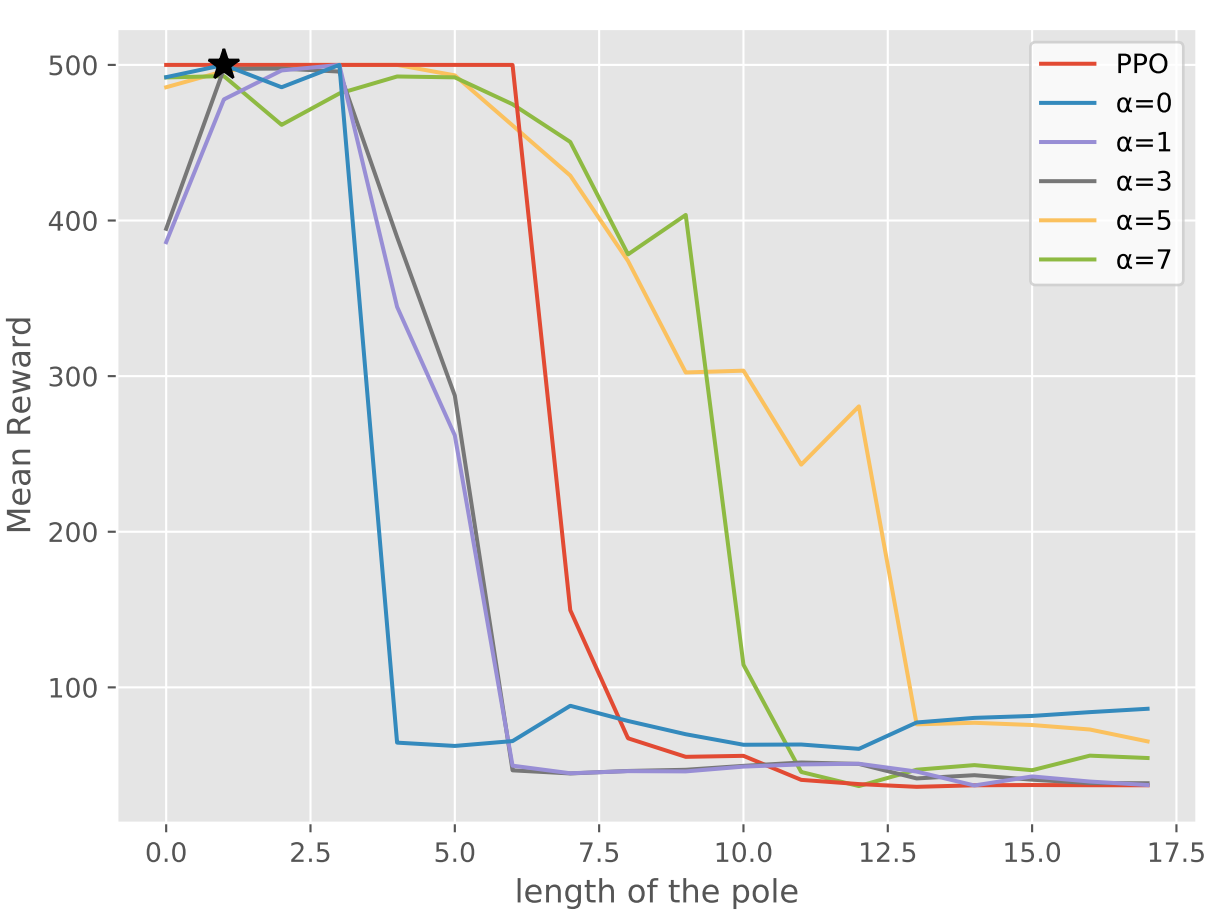

Supplement: supplementary_material [file attachment]

Mean Reward of 20 trajectories  $\pm$  standard deviation

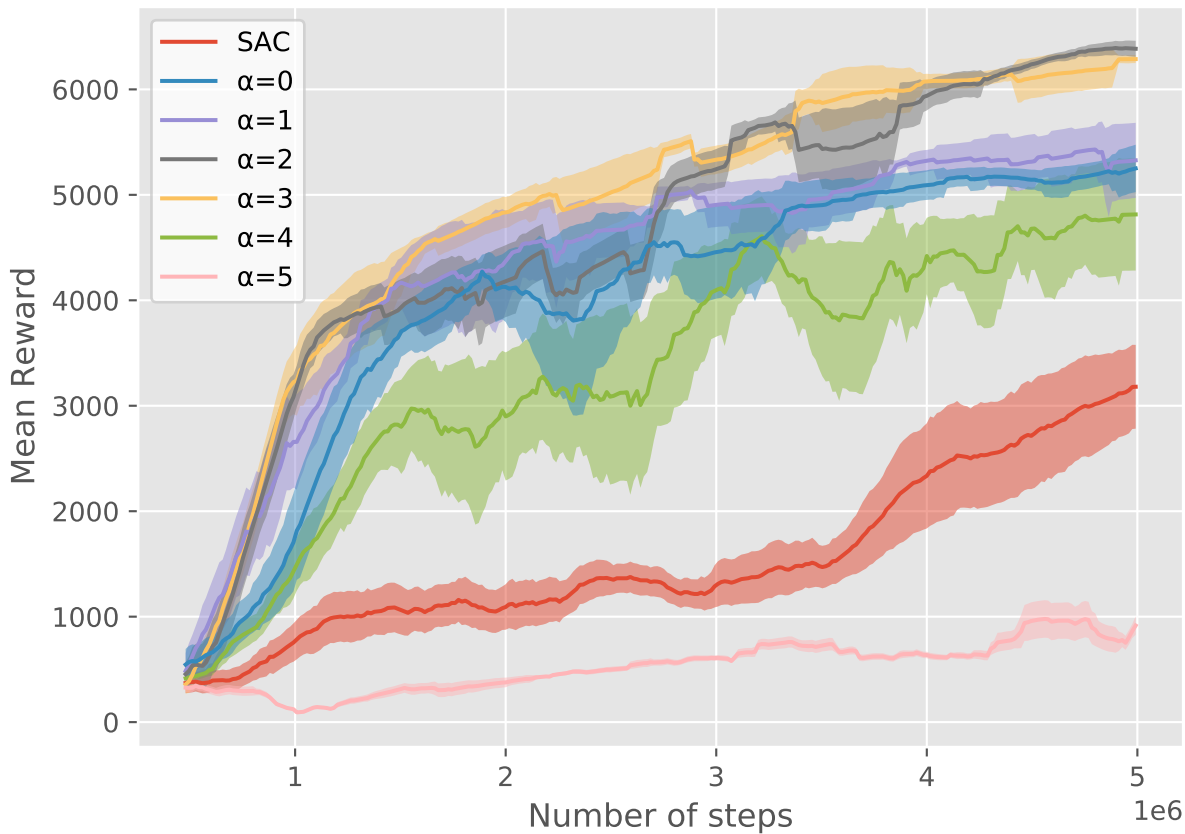

Supplement: supplementary_material [file attachment]

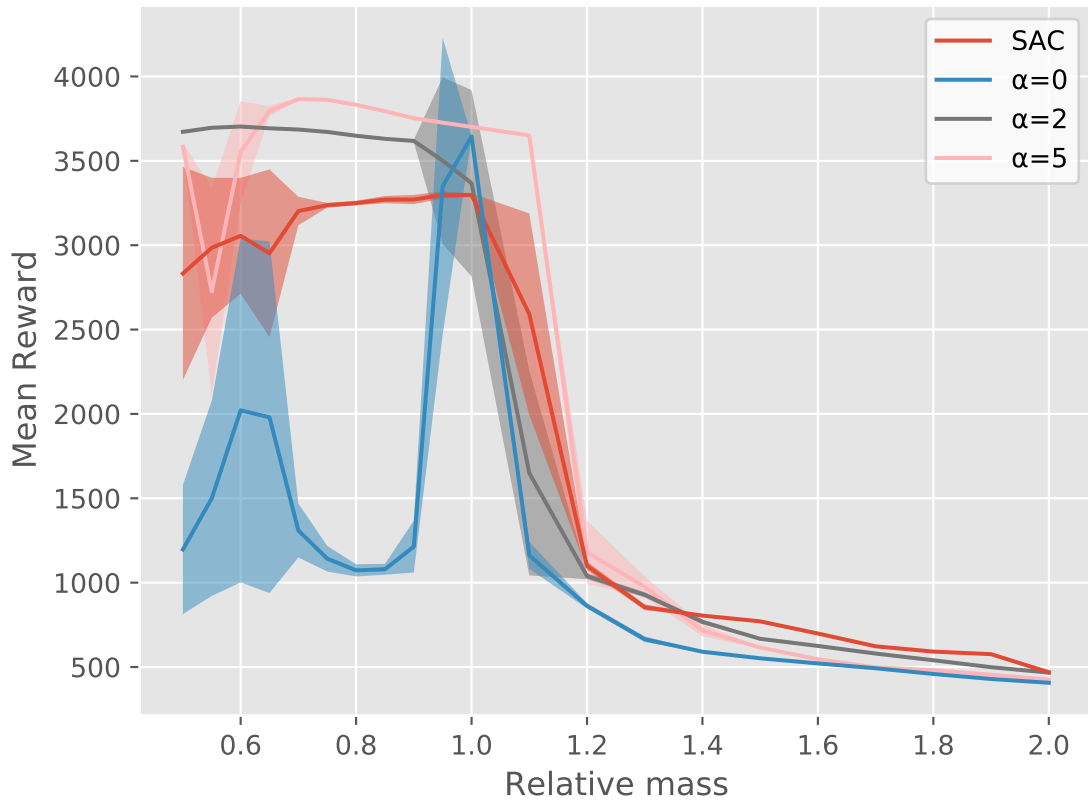

Supplement: supplementary_material [file attachment]

Mean Reward of 20 trajectories  $\pm$  standard deviation

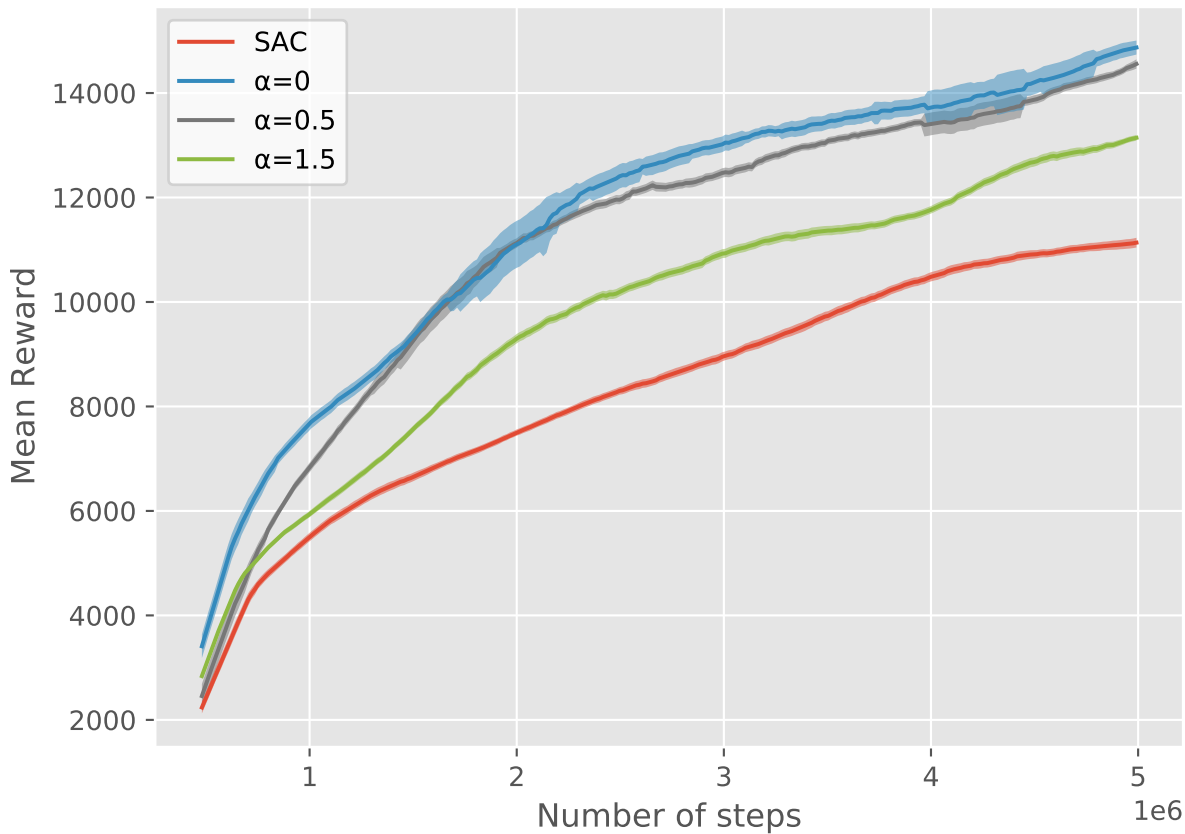

Supplement: supplementary_material [file attachment]

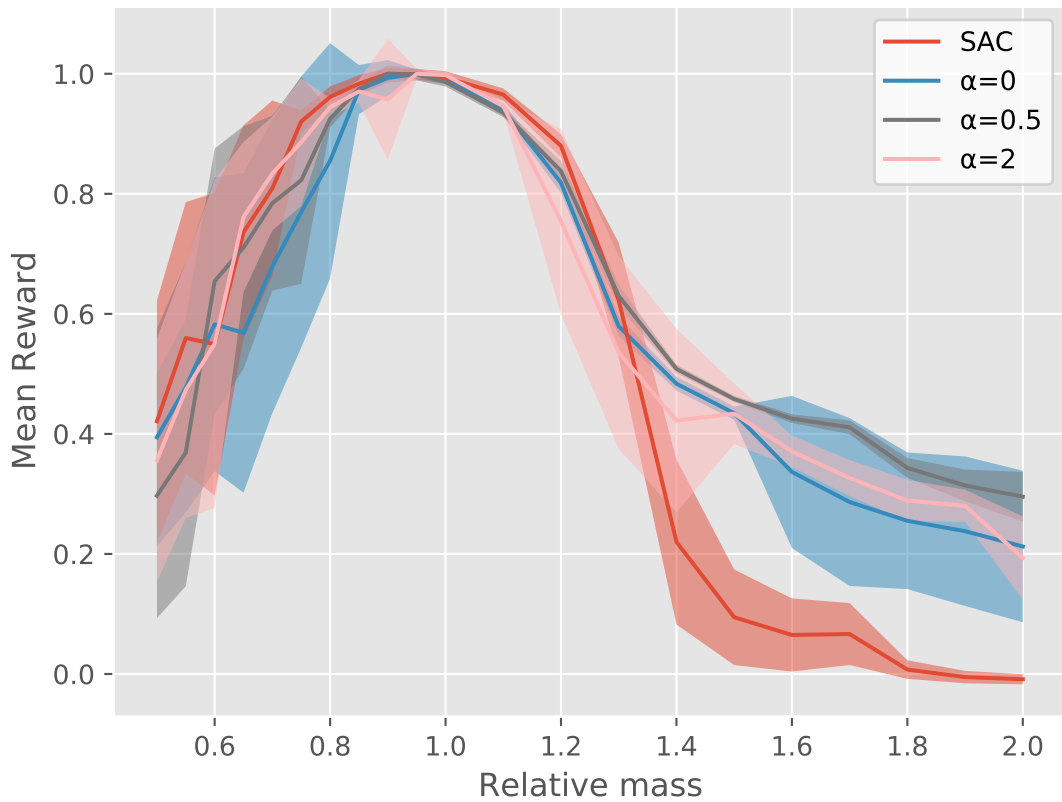

Supplement: supplementary_material [file attachment]

Mean Reward of 20 trajectories  $\pm$  standard deviation

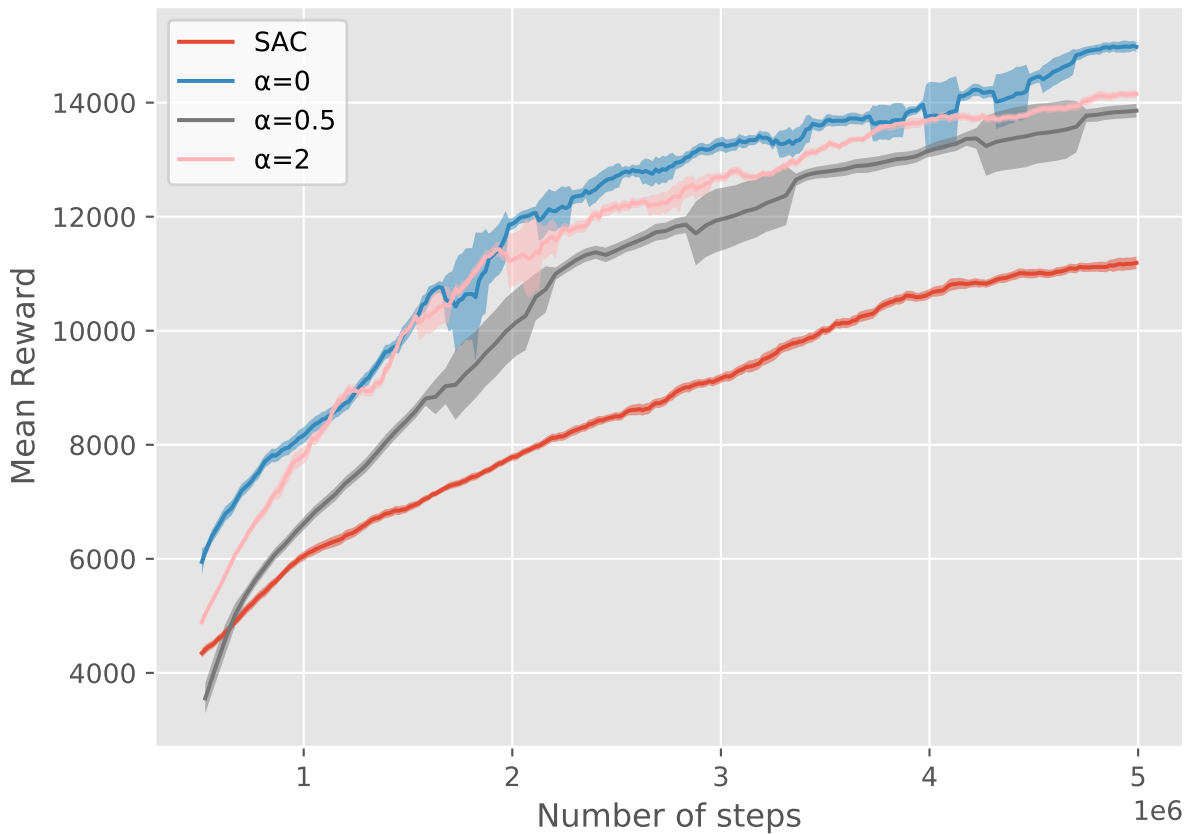

Supplement: supplementary_material [file attachment]

Mean Reward

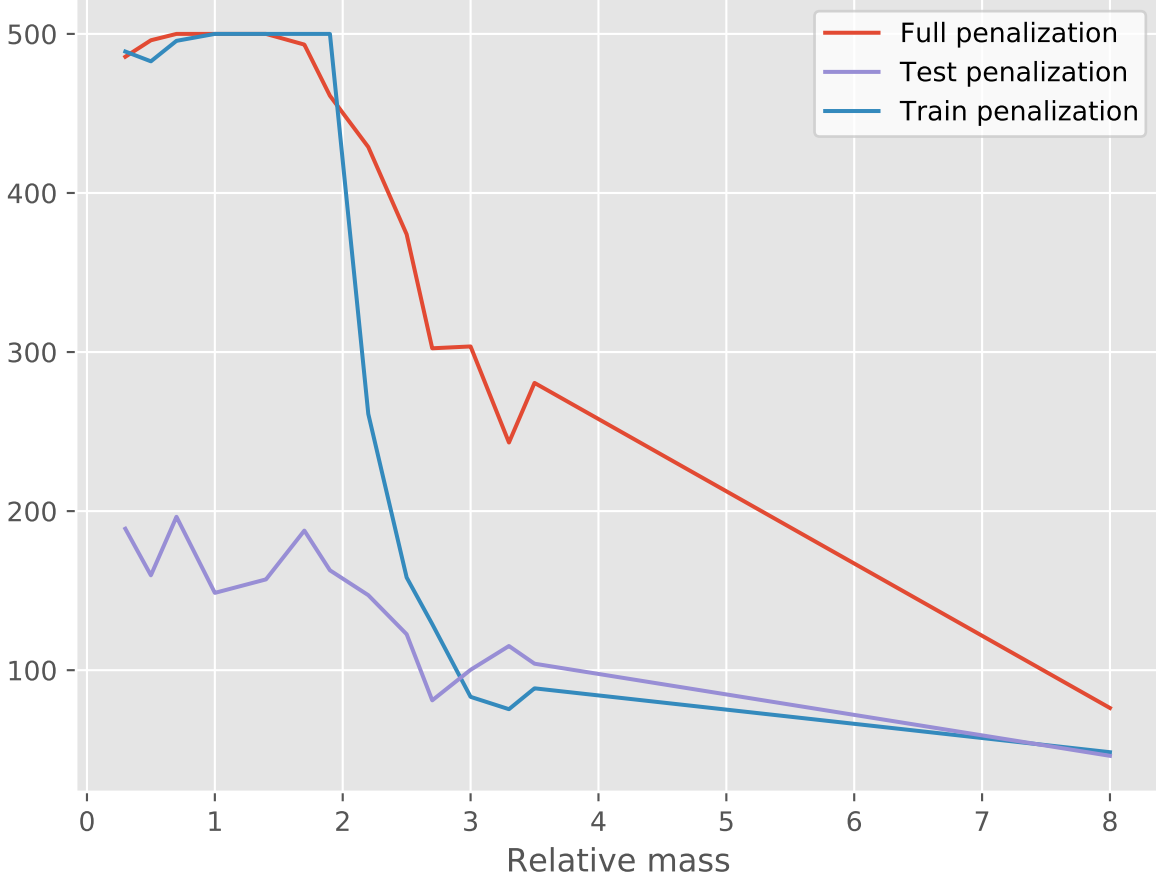

Supplement: supplementary_material [file attachment]

Mean Reward of 20 trajectories  $\pm$  standard deviation

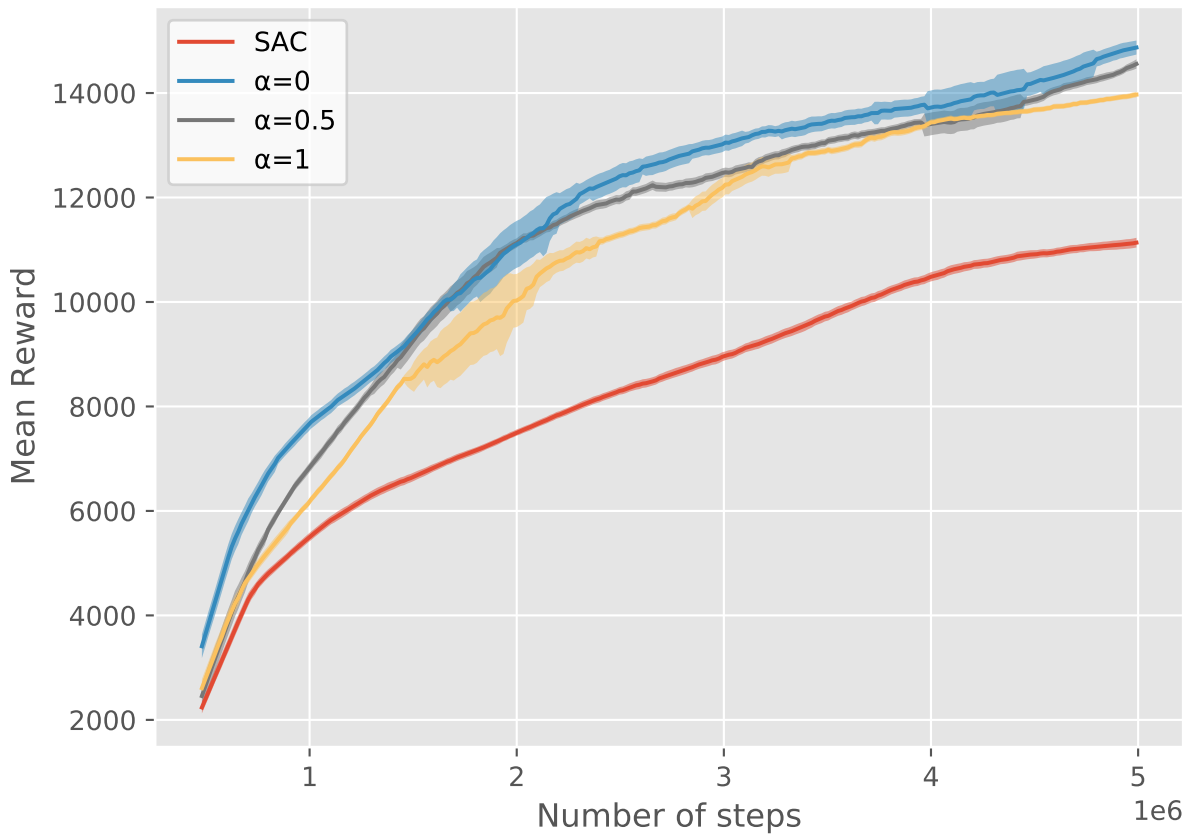

Supplement: supplementary_material [file attachment]

Mean Reward of 20 trajectories  $\pm$  standard deviation



Supplement: supplementary_material [file attachment]

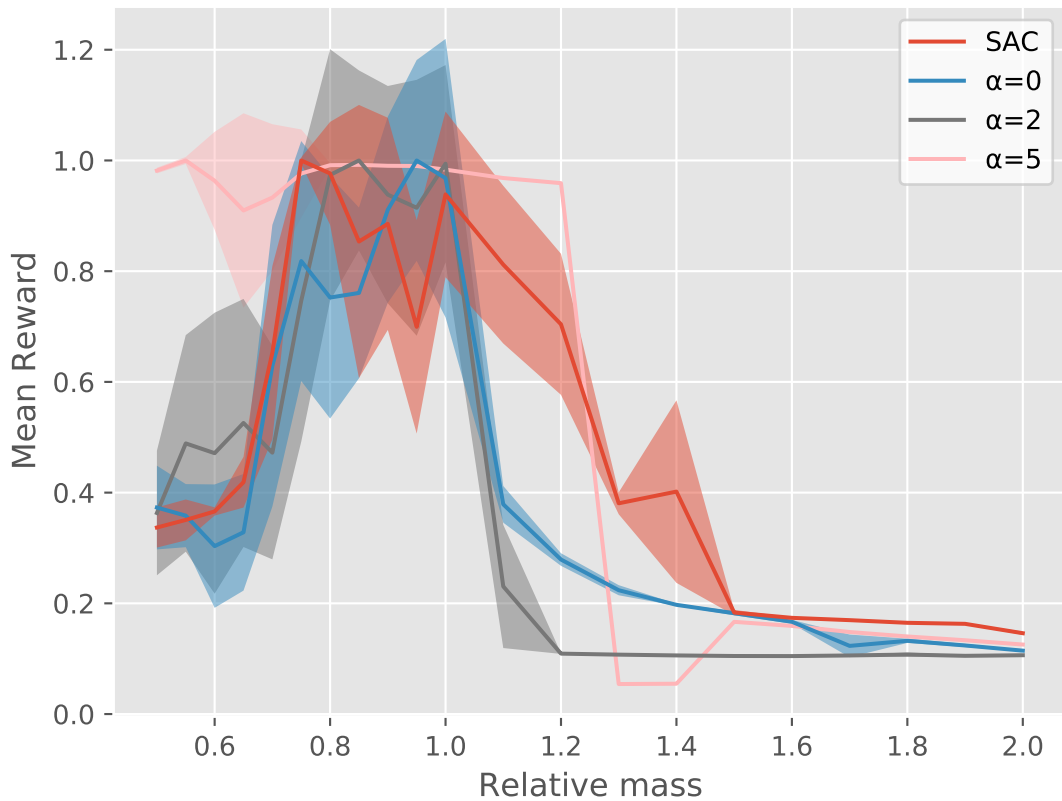

Supplement: supplementary_material [file attachment]

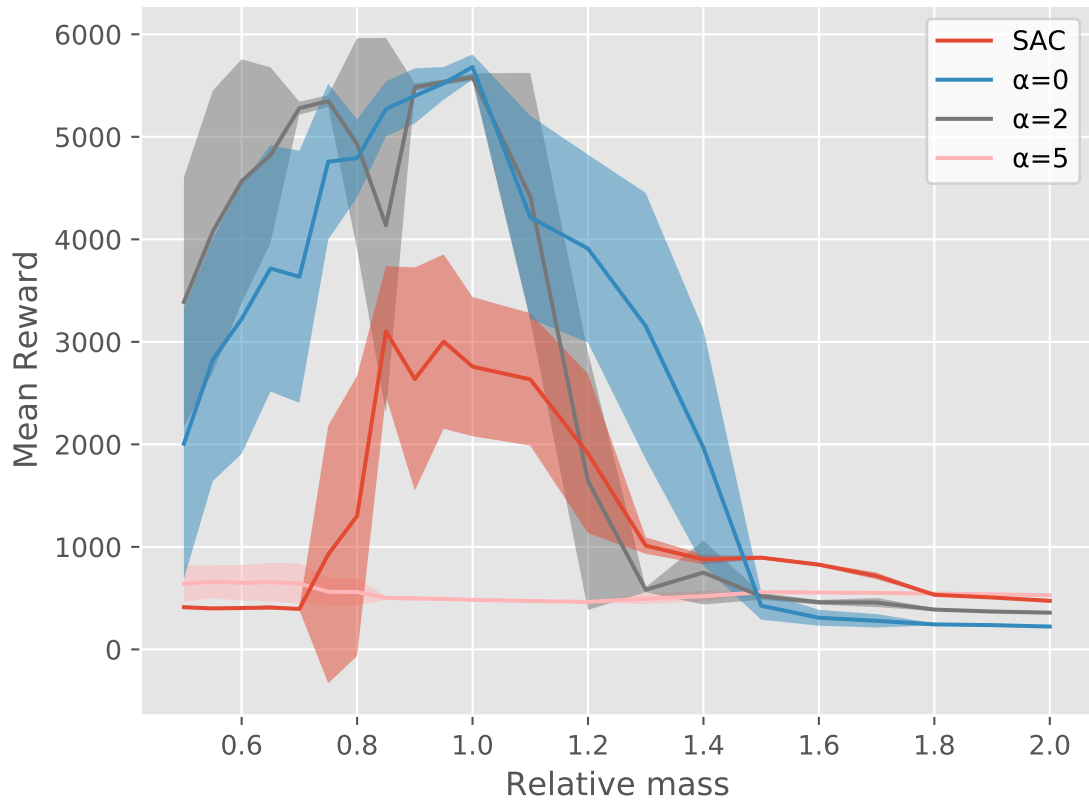

Supplement: supplementary_material [file attachment]

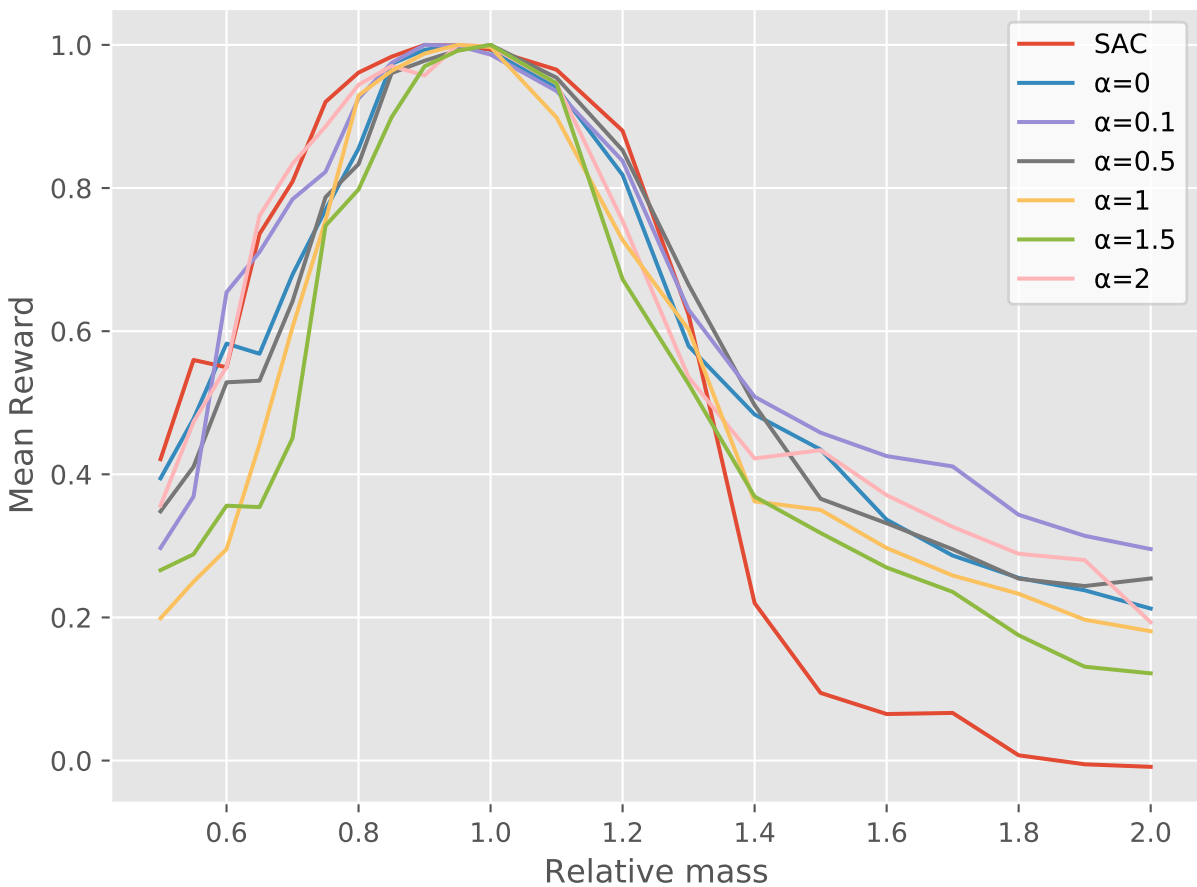

Supplement: supplementary_material [file attachment]

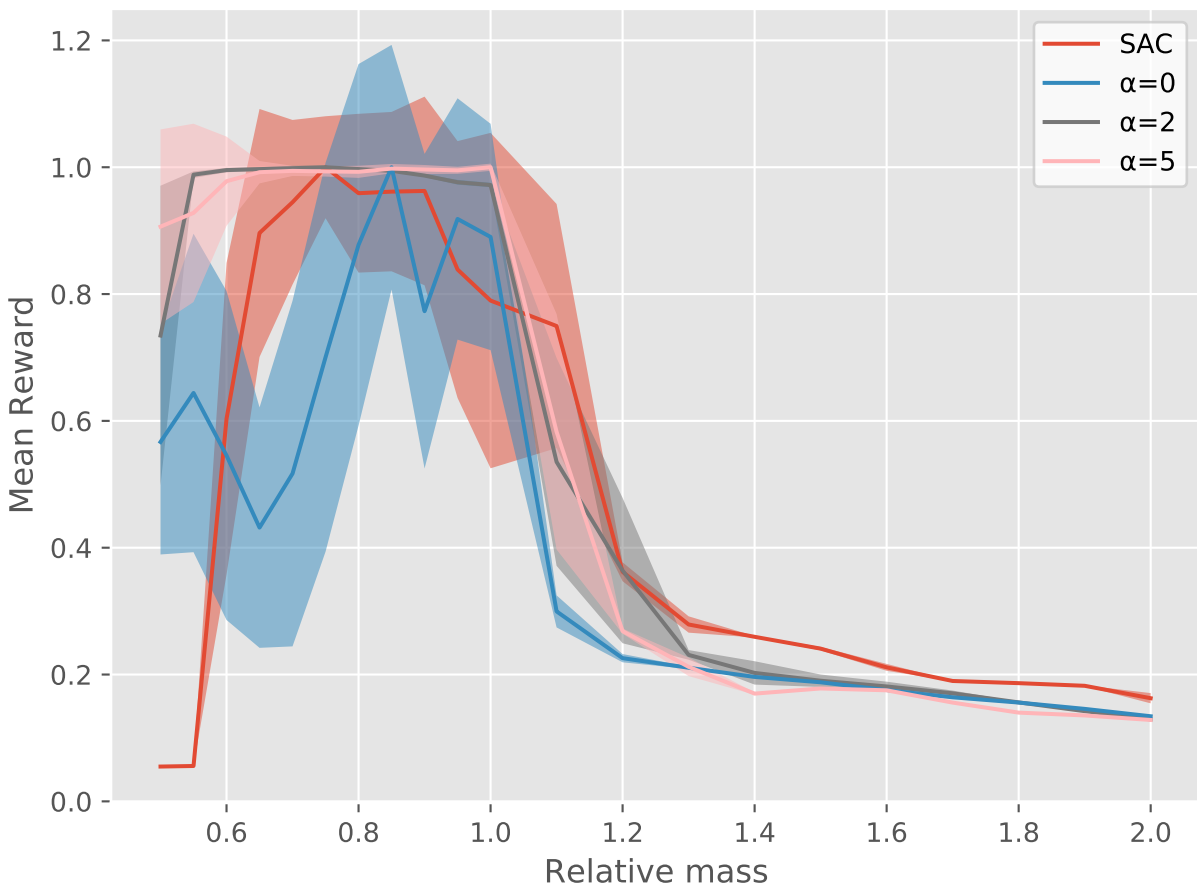

Supplement: supplementary_material [file attachment]
